# Supplementary material for: Genome-based identification of the CYP75 gene family in Orchidaceae and its expression patterns in Cymbidium goeringii
Source: Front Plant Sci. 2023 Sep 27;14:1243828. doi: 10.3389/fpls.2023.1243828 (PMC10564990; doi:10.3389/fpls.2023.1243828)
Supplement: Supplementary file 3 [file DataSheet_2.xlsx]

## Sheet: Table S2
Table S2. CYP75 protein sequences of 13 orchids and query sequences.
Gene ID	Gene Name	Gene Sequences
PAXXG087010	PapCYP75A1	MSIFLIATLFLSLSLHLLLRRFRRRRRILPLPPGPLNFPIVGALPFIGPMPHSGLALLSRRYGPIMFLKMGIRQVVVASSSSAARSFLKTHDSRFSDRPLDIISKQVSYNGQNMVFADYGPKWKLLRKVSNLHLFGPKAMSRWADVRRDEAFSMSHFLKKQSDSKNPVLLSNLLVCSMANVIGKIAMSKRVFDEEGKEAKEFKEIIKELLVGQGASNIGDLVPAMRWLDPQGARKKLLGLNKRFVRMISKFLAEHGESRREREGNPDLLDLIVADKIAGDDGEGLSEENIKGFISDLFVAGTDTSAIVIEWAMAEMLKNPAILRRVQEETDRIVGRDRLLEESDIPNLPYLQAICKEALRKHPPTPLSIPHYASEPCEVEGYHIPGKTWLLVNIWAIGR…
PAXXG006510	PapCYP75B1	MECTNQLATKKMTPFLLNMIFTILLSSLFLFLFAAFKSLISRRHRLPLPPGPNGWPLLGFLPKLGPNPHQIFHRLSKTYGPLLHLRFGVVDVVVPCSAAVAERLLRNDMKFINRPKNSGAEHIAYNYQDIGFLPYGPQWRMQRKLCALHLFSGKALEDFQDGRREEFARLVRRLAAQSVEEAAAAVDIRREVAACVGNSLSLLLLGRRAFDEDPKEGEELRNMVMELMALTGSFCISDFVPGLAWLDPQGLIARMKKLNRKFDEFLNMFIAEHRAALAEATPLMSAAEDDAQSHPKDLLTLMLQLQETNEEDEGGAKLTDTDIKALLMALYAAGSDSNSLLAEWALAELIHNPIILKRAQAELDSVVGRDRLVSESDLPKLPLLQAIVKETLRLHPPAP…
PAXXG079820	PapCYP75B2	MSILLLLPLLLLLIPFFLNTKRSNLPLPPGPKGPPIVGNLLQLGPKPHQTLYKLSQTYGPLLHLRFGLHHMIVVNSASIASKLLRNDAIISSRPTSSSVKHLAYNHQDLIFAHYGPRWRMLRKICALQLFSPKAMEDLAPVRADEVGRFVRELAGKGDREELVNLSEGISGCAADALSRVVVGRRVFGDGEESREFKDMVEEMMNLSSAFNINDFVPGLSWLDLQGLVAKMKKLHRKFDEFLDRVIEDHKARLTETADEVSGGGGRGRHNDLLSVLIEAKEEAHGEGITLTDADIKPLLQNMFAAGTDTSSNTIEFVLAELIRHPDLLSRAQQELDNVVGRRRLVAETDLPNLPFFQAVIKETFRHHPAAPLSLPRIISEDHQIDGYLIPKGATLLINI…
PAXXG116530	PapCYP75B3	MIVIILSILFFSALLLSSLFPTLTDRRRPPLPPGPKGWPLVGNLLQLGTKVHQTLQHLSNSHGSAGLLRLRLGTVDVIVISSASAAAKCFRSHDAKLSSRPPNSLGRHFAYNFQDLIMAPYGPRWRMLRKICATHLFSTKVLDSFQHVREDELATLVRDLASDRDAVIDVGAVVNTCATNALARVLVGRRVIVGGEEAAKFKEIAAEISKVAGEFNVGDFVPGIDWLDLQGLNKKMRRIRERFGEFLDKVIEEHRLKRVNHTKDFLSVLIEMNGSAQGEQDEIIGINIKALLQDMFIAGTETVSITAEWVLAELIRHPHILARAQHELDSVVGRDRFICESDLSKFPFLHAIVKETLRLHPPLPLSLPRMTVEDFEIDGYLIPKGVTVLINLWAIGRDS…
PAXXG116560	PapCYP75B4	MIVIILSILFFSVLLLSSLFPTLTNPRRPPLPPGPKGWPLVGNLLQLGTKAHQTLQHLSNSHGSAGLLRLRLGTVDVIVISSASAAAKCFHSHDAKLSSRPPNSLGRHFAYNFQDLALAPYGQRWRMLRKICATHLFSTKALDSFQHVREDELSTLVRGLASDRDAVIDVGAAVNICAINALARVLVGRRVIVEGEEAAKFKQMAAEISRLAGEFNIGDFVPGIDWLDLQGLNRKMKKNLERFGEFLEKIIDEHRSNGFNHTKDFLSVLIEMNDSAKEELDDINIKALLQDMFIAGTETISITVEWILAELIRQPHNLARAQQELDSVVGRDRFISESDLSKFSFLHAIVKETLRLHPALPLALPRMTIEDFEIDGYLIPKGVTVLINLWAIGRDPAAW…
PAXXG116590	PapCYP75B5	MKKVRERFGEFLQKIIDEHRSIGFNHQTRDFLSVLIEMKDSAKEEFADINIKALLQDMFIAGTETTSITVEWILAELIRHPKILARAQQELDSIVGRDRLINESDLSKFSFLHAIVKETFRLHPPVPLSVPRMTTEDSWIDGYLIPKGITLLVNIWAIGRDPVTWPSDPNKFNPDRFGPSSPHMNVDAKGSDFELIPFGAGRRMCAGMNLGLRMVHLMTAILLHSFDWTLPDDRTANILDMEESCGATMHKAMPLVAKAVPRLSPQAYL
PAXXG172030	PapCYP75B6	MAFLSYLLLSTTFLLLLLLLLTLLLLSGDSRKRIRRFPPGPKGWPIIGNLPQLGPKPHQTLTALSKTYGPIIGLRFGSVAVVTVSSAAAAAQFLRSHDANFSSRPPNSGAEHIAYNYQDLAFAPYGARWRMLRRLCAVHLFSAKVMEDFRHVRGGEVERLVRGIAEKGGGAVGVGAAVNACATDALTRVVVGRRVFGDGKEEKEGAEEFKEMVVELMQLAGVFNLGDFVPCLAWLDLQGVVRKMKKLHGRFDKFFDGIIAEHREAIENGEVNGGGSDMLSILIRMKEEGDGEGFKLSDTDIKALLLNLFAAGTDTTSSTVEWALAELIRHPKILKRAQNELDSVIGLNRLATESDLLQLPYLQSIVKETFRLHPSTPLSLPRVASTDCEIDNYFIPKGS…
Peq013982	PeqCYP75A1	MPITQPIRPLLPLPPGPLNFPIVGALPFIGPMPHSGLALLSRRYGPIMFLKMGIRQVVVASSSAAARSFLKTHDSRFSDRPLDIISKQVSYNGQNMVFADYGPKWKLLRKVSNLHLFGPKAMSRWANVRRDEAFSMSHFLKKQSDSKNPVFLSNLLVCSMANVIGRIAMSKRVFDEEGKEAKEFKEIIKELLVGQGASNIGDLVPAMRWLDPQGARKKLLGLNQRFVRMISKFLAEHGESRGEREGNPDLLDLIVADKIAGDDGEGLSEENIKGFISDLFVAGTDTSAIVIEWAMAEMLKNPAILRRAQEETDRIVGRDRLLEESDIPNLPYLQAICKEALRKHPPTPLSIPHYAGEPCEVEGYHIPGKTWLLVNIWAIGRDPEVWEKPLEFDPERFME…
Peq002928	PeqCYP75B1	MAVLSYLLLSTTFLLLLTLLLFSGNSRKRIRRFPPGPKGWPIIGNLPQLGPKPHQTLTALLRSHDANFSSRPPNSGAEHIAYNYQDLAFAPYGARWRMLRRLCAVHLFSAKVMEDFRHVRGGEVERLVRGIAEKGGGAVGVGAAVNACATDALTRVVVGRRVFGDGKEEKEGAEEFKEMVVELMQLAGVFNIGDFVPCLAWLDLQGVVRKMKKLHGRFDKFFDGIIAEHREAIENGEVNGGGSDMLSILIRMKEEGDGEGFKLTDTDIKALLLNLFAAGTDTTSSTVEWALAELIRHPKILKRAQNELDSVIGLNRLATESDLPHLPYLQSIVKETFRLHPSTPLSLPRVASTDCEIDNYLIPKGSTLLVNIWAIGRDESTWADGPLEFKPERFLPGGL…
Peq006329	PeqCYP75B2	MTPFLLNMIFTILLSSLFLFLFAAFKSILSRPHRLPLPPGPKGWPLLGFLPKLGPNPHQTFHRLSKTYGPLLHLRFGVVDVVVPCSAAIAERLLRNDMKFINRPKNSGAEHIAYNYQDIGFLPYGPQWRMQRKLCALHLFSGKALEDFQDGRREEFARLVRRLAAQSVEEASAAADISTEVAACVGNSLSLLLLGRRAFDEDPKEGEELRNMVMELMALTGSFCISDFVPGLGWLDPQGLIARMKKLNRKFDKFLNIFIAEHRAALAEATPLMSAAEDDAQSRPKDLLTLMLQLQETNEEDEGGAKLTDTDIKALLMALYAAGSDSNSLLAEWALAELIRNPIILKRAQAELDSVVGRDRLVSESDLPKLPLLQAIVKETLRLHPPAPISLPRVAVEDC…
Peq008143	PeqCYP75B3	MRRIRERFGEFLDKVIEEHRLQRVNHTKDFLSVLIEMNGSAEGEQDEIIDINIKALLQDMFIAGTETVSITAEWVLAELIRHPHILARAQHELDSVVGRDRFICESDLSKFPFLHAIVKETLRLHPPLPLSLPRMTVEDFEIDGYLIPKGVTVLINVWAIGRDSASWPDDPCKFNPDRFGSSSLHANVDAKGNDFELIPFGIGRRMCAGINLGLRMLHLITAILLHSFDWTMPDGYMAEKLDMEESYGVSMPKVKPLMAKAMPRLAPNTYL
Peq008146	PeqCYP75B4	MAVIFLICVLFFPLLLLSTLFLTSDRHRSSLPPGPKDWFLLGHLLQLGTKPHQTLRALAKSHGSAGLLRLRLGTVDVIVISSASAAAKCFRGHDAKLSSRPPNSVGKHITYNFQDIIMAPYGPRWRMLRKLCSMHLFSSKSLDGLQHVRDEEAARLVLELASGREAAVDVGGVVNTCVTNALARVLVGRRVIVEGEEAAKFKEMTAEMARLAGEFNVGDFVPGIDWLDLQACLQLISGLNKKMKKVRERFGEFLEKIIDEHRSIGFNHQTRDFLSLLIEMKDSAKEEFADINIKALLQDMFIAGTETTSITVEWILAELIRHPKILARAQHELDSIVGRDRLINESDLSKFSFLHAIVKETFRLHPPVPLSVPRMTTEDSWIDGYLIPKGVTLLINIWA…
Peq013868	PeqCYP75B5	MSILLLLPLLLLLLIPFFLNTKRSNLPLPPGPKGSPIVGNLLQLGPKPHQTLYKLSQTYGPLLHLRFGLHHMIVVNSASIASKLLRNDAIISSRPTSSSVKHLAYNHQDLIFAHYGPRWRMLRKICALQLFSPKAMEDLAPVRADEVGRFVRELAGKGDREELVNLSEGISGCAADALSRVVVGRRVFGDGEESREFKDMVEEMMNLSSAFNINDFVPGLSWLDLQGLVAKMKKLHRKFDEFLDRVIEDHKARLTETADEVSGGGGGGRGRHNDLLSVLIEAKEEAHGEGITLTDADIKPLLQNMFAAGTDTSSNTIEFVLAELIRHPDLLSRAQQELDNVVGRRRLVAETDLPNLPFLQAVIKETFRHHPAAPLSLPRIISEDHQIDGYLIPKGATLL…
GL07540	CgCYP75A1	MSIFLIAALLLCLFLHLLLRRRRGCLPLPPGPPNLPILGALPFIGPMPHSALALLARHYGPIMFLKMGTRRVVVASSAAAARSFLKTLDSHFSDRPTGIISKEISYNGQNMVFADYGPKWKLLRKVSSLHLLGSKAMSRWSGVRRDEAFSTLQFLKNRSDSGKPVLLPNLLVCAMANVIGRISMSKRVFDEDGKEAKEFKEMIKELLVGQGASNIGDLVPGIRWLDPQGVRKKMLGLNRRFDRMVSKLLVEHAETAAERQGNPDLLDLMMANKVTGEDGEGLNEENIKGFISDLFVAGTDTSAIVIEWAMAEMLKNPAILRRAQEETDRVVGRHRLLDESDIPNLPYLQAICKEALRKHPPTPLSIPHYASEPCEVEGYSIPGKTWLFVNIWAIGRDPD…
GL10771	CgCYP75A2	MMANKVTGEDGEGLNEENIKGFISDLFVAGTDTSAIVIEWAMAEMLKNPAILRRAQEETDRVVGRHRLLDESDIPNLPYLQAICKEALRKHPPTPLSIPHYASEPCEVEGYSIPGKTWLFVNIWAIGRDPDVWEEPLAFDPERFLQGKMAKIDPMGNDFELIPFGAGRRICAGKLMGMLMVQYFLGILVHAFDWSLPEGVGELDMEEGPGLVLPKAVPLSVVARPRLAPAAYRLD
GL07339	CgCYP75B1	MLLYIRKPSRSRGRNQMALVIFVLFATILFASLLFIVISGDRRRGRSNLPPGPKGWPIIGNLPQLGPKPHQTLHALAKTYGPILRLRLGAVDVVVASSAAVASQFLRTHDANFSSRPPNSGAEHVAYNYQDLVFAPYGARWRMLRRLCASHLFSAKAMEDFRHVRGGEVERLVHGIAEEEGVAVDVGGAVNTCATNALTRVMVGRRVFGGREEKEGAEEFKEMVVELMKLAGVFNIGDFVPGLGWLDLQGVVRKMKKLHKRFDKLLDGIIAEHRESVDKGSVHGRGSDMLSILLRLKEEAHGEGILLTETAIKALLLNLFTAGTDTTSSTVEWAMAELIRHPNLLKQAQTEIDSVVGHNRLVSESDLPNLPFLQATVKETFRLHPSTPLSLPRVASSDC…
GL13941	CgCYP75B2	MKKLNRKFDEFLNKFIAERRAALAEITPSKSAVEDGGAQSCPKDLLTLLLQLQETNVDEEGAKLTDTDIKALLMTLYAAGSDSNSILAEWALAELIRNPIILKRAQAEIDSVVGRDRLVFESDLPNLPLLQAIVKETLRLHPPAPISLPRVAVEDCQVDGYVIPKGTTLLLNIWAIGRDPAVWPDDPLDFRPDRFLPGGLHEGVDLKGTCFGLLPFGTGRRMCVGMNLGLRMLGLMTATMVHSFDWHLPNGQTPQTLDMEEKSNGLSLVRAKPLLARPVPRLKPEAYFKESL
GL26796	CgCYP75B3	VIFTFLLFFISVLLLSSLFLVGTGRRRRPPLPPGPKGWPLLGNLLQLGTKPHRTLQALSQSHGSAGLLRLRLGTVDAIVISSASAAAKCFRSHDAILSSRPPNSVGKYITYNFEDLIMAPYGPRWRMLRKVCSTHLLSTKALDSFRNVWDEDVATVVRELASGREVAVDVGGLANTCVTNALAHVLVGRPVIVGGEEAAEFREIALEMTTLAGQFNVGDFIPGIGWLDLQGLKKKMTKIRIRFGEFLEKIIEEHRSKGIDYAKDFLSVLIQINGGPNAKHDELTTINIKALLQDMFIAGTDTTSITIEWLLSELLRHPHILARAQHELDSVAGCNRLISQSDLPKVPFLDAIVKETLRLHPPVPLSVPRMATEDCEIDGYLIPKGAYLLVNIWAIGRDL…
GL26797	CgCYP75B4	MTKIRIRFGEFLEKIIEEHRSKGIDYAKDFLSVLIQINGGPNAKHDELTTINIKALLQDMFIAGTDTTSITIEWLLSELLRHPHILARAQHELDSVAGCNRLISQSDLPKVPFLDAIVKETLRLHPPVPLSVPRMATEDCEIDGYLIPKGAYLLVNIWAIGRDLATWHDDPHEFDPDRFGPGSPHESADVKGINNFELIPFGAGRRRCAGMKLGLRMVHLVTAMLLHAFDWTLPDGSMGDTLDMEESYGATMRKTRPLMAKATPRLAPQAYL
GL27961	CgCYP75B5	MAILSLLLVPLLLLLSAILLARRIRPRRQSKLPLPPGPKGSPILGNLLQLGPKPHETLYNLSKAYGPLIHLRFGFVDMIVINSAAIAAKILRNDANVASRPSSTSVKHIAYNHQDLIFAKYGSRWRMLRKICALQLFSPKAMEDLAPVRADEVGRFVRELVKEENFVDLSDGISACAADALSRVVVGKRVFGDGEESREFKDMVMEMMNLSSAFNINDFVPGLGWLDVQGLVAKMKKLHRKFDEFLDKVIEDHKARLTETETATAAAGGRGRHNDLLSVLIEAKGDANGDGIALTDADIKPLLQNMFAAGTDTSSNTIEFVIAELIRHPELLVRAQQELDNVVGRRRLVAESDLPNLPFFQAVVKETFRHHPAAPLSLPRSISEDYEIDGYLIPKGATL…
GL27962	CgCYP75B6	MQGLVAKMKKLHRKFDEFLDKVIEDHKARLTETETATAAAGGRGRHNDLLSVLIEAKGDANGDGIALTDADIKPLLQNMFAAGTDTSSNTIEFVIAELIRHPELLVRAQQELDNVVGRRRLVAESDLPNLPFFQAVVKETFRHHPAAPLSLPRSISEDYEIDGYLIPKGATLLINIWAIGRDPIAWPDETLAFQPDRFLPGGRHEGADVKGNDFELIPFGGGRRICAGMNLGLRMVQFLSATLVHAFDWKLPEGELPEKLDMDLSFGLTLHRTNPLMVRPVPRLEPQAYV
JL017476	CeCYP75A1	MSIFLIAALLLCLFLHLLLRRRRACLPLPPGPPNLPILGALPFIGPMPHSALALLARHYGPIMFLKMGTRRVVVASSAAAARSFLKTLDSHFSDRPTGIISKEISYNGQNMVFADYGPKWKLLRKVSSLHLLGSKAMSRWSGVRRDEAFSTLQFLKNRSDSGKPVLLPNLLVCAMANVIGRISMSKRVFDEDGKEAKEFKEMIKELLVGQGASNIGDLVPGIRWLDPQGVRKKMLGLNRRFDRMVSKLLVEHAETAAERQGNPDLLDLMMANKVTGEDGEGLNEENIKGFISDLFVAGTDTSAIVIEWAMAEMLKNPAILRRAQEETDRVVGRHRLLDESDIPNLPYLQAICKEALRKHPPTPLSIPHYASEPCEVEGYSIPGKTWLFVNIWAIGRDPD…
JL011638	CeCYP75B1	MTPLLYMIFAILLPTLLLFAAFKSLCSSSSRRHRLPLPPGPKGWPLLGFLPKLGPNPHQIFHRLSKTYGPLLHFRFGVVDVVVPCSAAIAEKLLRNDMKFINRPKNSGAEHIAYNYQDIGFLPYGPRWRMQRKLCALHLFSAKALDDFQDGRAAEFMRLVRRLAAVDISKEVAACVGNSLSLLLLGRRVFDEDLEVEEELRGMVMELMALTGSFCIADFLPGLGWLDPQKLNRKFDEFLNKFIAERRAALAEITPSKSAVEDGGAQSCTKDLLTLLLQLQETNVDEEGAKLTDTDIKALLMTLYAAGSDSNSILAEWALAELIRNPIILKRAQAEIDSVVGRDRLVFESDLPNLPLLQAIVKETLRLHPPAPISLPRVAVEDCQVDGYVIPKGTTLLLN…
JL016547	CeCYP75B2	MAILSLLLVPLLLLLSAILLARRIRPRRQSKLPLPPGPKGSPILGNLLQLGPKPHETLYNLSKAYGPLIHLRFGFVDMIVINSAAIAAKILRNDANVASRPSSTSVKHIAYNHQDLIFARYGARWRMLRKICALQLFSPKAMEDLAPVRADEVGRFVRELVKEENFVDLSDGISACAADALSRVVVGKRVFGDGEESREFKEMVMEMMNLSSAFNINDFVPGLGWLDVQGLVAKMKKLHRKFDEFLDKVIEDHKARLTETETATAGGGGRGRHNDLLSVLIEAKGDAHGDGIALTDADIKPLLQNMFAAGTDTSSNTIEFVIAELIRHPELLVRAQQELDNVVGRRRLVAESDLPNLPFFQAVVKETFRHHPAAPLSLPRIISEDYEIDGYLIPKGATL…
JL021317	CeCYP75B3	MAVIFTFLLFSISVLLLSSLFLVGTGRRRRPPLPPGPKGWPLLGNLLQLGTKPHRTLQALSQSHGSAGLLRLRLGTVDAIVISSASAAAKCFRSHDAILSSRPPNSVGKYITYNFEDLIMAPYGPRWRMLRKVCSTHLLSTKALDSFRHVWDEDVTTVVRELASGREAAVDVGGLLNTCVTNALAHVLVGRPVIVGGEEAAEFREIALEMTTLAGQFNVGDFIPGIGWLDLQASLYEHKGLKKKMTKIRIRFGEFLEKIIEEQRSKGIDYRSKGIDYAKDFLSVLIQINGGPNAKHDELTTINIKALLQDMFIAGTDTTSITIEWLLSELLRHPHILARAQHELDSVAGCNRLISQSDLPKVPFLDAIVKETLRLHPPVPLSVPRMATEDCEIDGYLIP…
Mol022332	CsCYP75A1	MSIFLIAALLLCLFLHLLLRRRRGYLPLPPGPPNLPILGALPFIGPMPHSALALLSRHYGPIMFLKMGTRRVVVASSAAAARSFLKTLDSHFSDRPTGIISKEISYNGQNMVFADYGPKWKLLRKVSNLHILGSKAMSRWSGVRRDEAFSTLQFLKNRSDSGKPVLLPNLLVCAMANVIGRISMSKRVFDEDGKEAKEFKEMIKELLVGQGASNIGDLVPGIRWLDPQGVRKKMLGLNRRFDRMVSKLLVEHAETAAERQGNPDLLDLMMANKVTGEDGEGLNEENIKGFISDLFVAGTDTSAIVIEWAMAEMLKNPAILRRAQEETDRVVGRHRLLDESDIPNLPYLQAICKEALRKHPPTPLSIPHYASEPCEVEGYSIPGKTWLFVNIWAIGRDPD…
Mol004997	CsCYP75B1	MKRKPSRSRGRNQMALVIFVLVASVLFASLLFIVVFGDRRRGRSNLPPGPKGWPIIGNLSQLGPKPHQTLHALAKTYGPILRLRLGAVDVVVASSAAAASQFLRTHDANFSSRPPNSGAEHVAYNYQDLVFAPYGARWRMLRRLCASHLFSAKAMKDFRHVRGGEVERLVHGIAEEEGVAVDVGGAVNTCATNALTRVMVGRRVFGGREEKEGAEEFKEMVVELMKLAGVFNIGDFVPGLGWLDLQGVVRMMKKLHKRFDKLLDGIIAEHRESVDKGDVHGRGSDMLSILLRLKEEAHGEGILLTETDIKALLLNLFTAGTDTTSSTVEWAMAELIRHPNLLKQAQTEIDSVVGHNRLVSESDLPNLPFLQATVKETFRLHPSTPLSLPRVASSDCEID…
Mol005994	CsCYP75B2	MIFAILLPTLLLFAAFKSLCRSSSRRHRLPLPPGPKGWPLLGFLPKLGPNPHQIFHRLSKTYGPLLHFRFGVVDVVVPCSAAIAEKLLRNDMKFINRPKNSGAEHIAYNYQDIGFLPYGPRWRMQRKLCALHLFSAKALDDFQDGRAAEFMRLVRRLAAPSVKGKKEEAVVDISKEVAACVGNSLSLLLLGRRVFDEDLDVEEELRGMVMELMALTGSFCIADFLPGLGWLDPQGLIARMKKLNRKFDEFLNKFIAERRAALAEITPSKSAVEDGGAQSCPKDLLTLLLQLQETNVDEEGAKLTDTDIKALLMTLYAAGSDSNSILAEWALAELIRNPIILKRAQAEIDSVVGRDRLVFESDLPNLPLLQAIVKETLRLHPPAPISLPRVAVEDCQVDG…
Mol021869	CsCYP75B3	MAILSLLLVPLLLLLSAILLAHRIRPRRQSKLPLPPGPKGSPILGNLLQLGPKPHETLYNLSKAYGPLIHLRFGFVDMIVINSAAIAAKILRNDANVASRPSSTSVKHIAYNHQDLIFARYGARWRMLRKICALQLFSPKAMEDLAPVRADEVGRFVRELVKEENFVDLSDGISACAADALSRVVVGKRVFGDGEESREFKDMVMEMMNLSSAFNINDFVPGLGWLDVQGLVAKMKKLHRKFDEFLDKVIEDHKARLTETENATAGGGRGRHNDLLSVLIEAKGDAHGDGIALTDADIKPLLQNMFAAGTDTSSNTIEFVIAELIRHPELLVRAQQELDNVVGRRRLVAESDLPNLPFFQAVVKETFRHHPAAPLSLPRIISEDYEIDGYLIPKGATLL…
Vpla_KAG0447236.1	VplCYP75A1	MATFLLACFLLCLLLHLLLGRLLLRCSSALPLPPGPFNFPILGSLPLIGPKHHSGLARLSRRFGPIMYLKMGMRNAIVVSSPSAARIFLKTLDSHFSSRPQGIISKALAYDGRDMVFADYGLNWKLLRRISSLHLLGPKAMAGWADVRRDEVSRMLLSIRSLGESHKAVVLPNLLVRTMANVIGRIALSQRVFDEEGKEAKDFKEMVMELLVGTGTSNMGDLVPALRWLDPLGTRKKMWRIHDRFDVMLTRLLAKHAATAWERQGKPDFLDLLAADGAAGRDEEHISEETIKAFIADLFVAGTDTSAIVIEWAMAEMLRKPSILRRAQEEIEGVVGRHRLLEESDIPNLPYLQAICKETLRLHPPTPLSIPHFASEPCEAGGYRIPGKSWLLVNIWAIG…
Vpla_KAG0447237.1	VplCYP75A2	MWRIHDRFDVMLNRLLAQHVATAGERLAKPDFLDLVAADGAAGGEPEHISKAAIKGFIADLFVAGTDTSAIVIEWAMTEMLRKPSILQRAQEEMERVVGRHRLLEESDIPNLPYLQAISKEALRLHPSTPLSIPHFASEPCEAGGYRIPGNSWLFVNIWAIGRNPDVWANPLEFDPERFLSGEMARVEPTGIDFEFIPFGAGRRVCAGKQMGMVMVQFILGSLVHSFDWSLPVGAVEIDMEEGTGLTLPKAVPLSAMASPRLKPAAYADE
Vpla_KAG0495957.1	VplCYP75A3	MGTARAVVASSPSAACSFLKAHDAQFANRPSVVSAKDITYDGQNMVFANYGPRWKHLRKLSALHLLGGRALSNWAPIRSEEVGCMLAAIRDKGRIVLSDELVCMMANVIGRATMSRRVFETQGKEADDFKEMIVELLTGGGLFNIGDFVPAIAWMDLQGVQAKMMRVHQRFDGMITRMVADHRQMAAEREREGRSDFLDLLMANRHGDDGESLSDVNIKGLIFDLFTAGTDTSSIIIEWAMAEMLRNPGILRRAQEEVDREVGRERRLVESDIRRLPYLRAVCKEAMRLHPSTPLSLPHFSFEACEVEGYRIPGNTRLLVNIYAIGRDPDVWADPLRFEPERFLPGGRGEGVEPMGSDFELIPFGAGRRICAGKQAGMLMVQYVLGSLIHSFDWRLPDG…
Vpla_KAG0496007.1	VplCYP75A4	MEWVLVGILSTILLCLHFANLRWRRGLPPLPPGPLGFPILGCLPLIGPAPHSSLARLARRYGPIMYLKMGTARAVVASSPSAACSFLKAHDAQFANRPSVVSAKDITYDGQNMVFANYGPRWKHLRKLSALHLLRGRALSNWAPVRSEEVGCMLGAIRDKGRVVLSDELVCMMANVIGRATMSRRVFETQGKEADDFKEMIVELLTGGGLFNIGDFVPAIAWMDLQGVQAKMMRVHQRFDGMITRMVAEHRQTAAEREREGRSDFLDLLMANRHGDDGESLSDVNIKGLIFDLFTAGTDTSSIIIEWAMAEMLRNPGILRRAQEEVDREVGRERRLVEFDIRRLPYLRAVCKEAMRLHPSTPLSLPHFSFEACEVEGYRIPGNTRLLVNIYAIGRDPDV…
Vpla_KAG0451884.1	VplCYP75B1	MDPALLFVILTVFCSTLFLTAIKRWSSHRLPLPPGPKGLPLLGYLTQLGPLPHQTFHRLSEKYGPLLHVRLGVVPVVVPCTATVAEKLLRNDIKFINRPKNSSAEHVAYNYQDIGFLPYGPKWRMQRRLCSLHLFSSKALDDFQHSRQSELARLVYSMAEQSGKGSKATVDVGKELAECVGNALSLLLVGRRVFEEGPEVEEFRNMVMELMTLTGSFCIADFLPGIGWLDPQGLISRMKKLNQKFDKFLGMFIAEHRAELTSERPKGAVEDGKPCNRDLLSVMLELQENADGEGDKLTDIDIKALLLSMFSAGSDSNSILAEWALAELIRVPDVLSRAQAELDSVVGRDRLVSESDLPNLPLLQAIIKETLRLHPPAPISIPRMAVEDCEVDGYLIPKG…
Vpla_KAG0455627.1	VplCYP75B2	MTSFLILFFFALLLASLLLARDRRSHRHCRLPPGPTGWPLLGNILQLGSKPHQTLHALSKTYGPLLHLRFGSVHVIVASNATTAAHFLRTHDANFSSRPPNSGAEHIAYNYRDLVFAPYGPRWRMLRRLCALQLFSAKALENLRHVREEEVVCLVQGLARAGKPVDVGAAVNTCATNALSRALVGRRVFSVDGSGEGPEEFKEMVVELMRLAGVFNVGDFVPAIAWLDPQGLVRKMKKLHKRFDEFLNKLITEHQEMADKSNNDMLSLLVKLKDETDGEDVKLTDTEIKALLLNLFTAGTDTTSSTVEWALVELIRAPGLLGRLQDELDSVVGRDRLVSESDLSELPLLQAVVKETFRLHPSTPLSLPRVATEDCKVDGFFIPSGTTLLVNVWAIGRDP…
Vpla_KAG0455628.1	VplCYP75B3	MTSLLILFFLALLASLFFAGCRRSHSHRRLPPGPKGWPVLGSIPHLGSKPHQTLYALSKNHGPLLHLRLGSVHVIVVSTATTAAHFLRTHDANFSNRPSNSGAEHIAYNYRDLVFAPYGPRWRMLRRLCALQLFSAKALEDLRHVRGEEIARLVRLFSRAGKPMDVGANVNTCVTNALSLAVVGRRVFGSDDGAAEFKEMVVELMRLAGVFNVGDFVPALAWLDPQGIVKKMKKLHKRFDGFLNKLIIEHQKMADKSNDLLSVLLKLKEETDEERTKLTDIEIKALLLNLFVAGTETTSIAIEWALVELIRSPGLLGRVQEELDSVVGRDRLVSESDLSGLPLLQAVVKETFRLHPSTPLSLPREAAEDCEVDGFFIPRGATLLVNVWAIGRDPVAWPD…
Vpla_KAG0466647.1	VplCYP75B4	MAPILVLVSFFTLIFLLSNFQKLKKSKSRRRPLPPGPKGWPILGYLPFLGPKPHQTFHALSNTYGPLLHLRLGTVDVIVPCSADMASKLLRNDMNFIQRPPNSAAKHIAYNYMGLGFSPYGPRWRMLRKLCTLQLFSTKALDGLQHARRGEVSRFVRRLAEANDRKNGSAATVDVSSEIAACVVNSLSQLLVGRRVFDDGEEVKEFKEMIMDLMYLTGAFHVGDFVPGIGWLDPQGLVKRMKRLHRNFDDFLNKVIEDYRGTTRSDNEKKASVDDGKGNEEGTNRRRNLLSVLLDLKENADGKDGSLKDIDIKTLFQDVFAAGSDTTTITAEWTLAELIRHPDMLARAQAELDDVVGRNRLVEESDLPNLPYLQAVLKETFRLHPPGPLSVPRMAVADC…
Vpla_KAG0466648.1	VplCYP75B5	MAPILVLVSFFTLIFLLSNFQKLKKNKSRRRPLPPGPKGWPILGYLPFLGPKPHQTFHSLSKTYGPLLHLRLGTVDVIVPCSADMASKLLRNDMNFIERPPNSAAEHIAYNYMDLGFSPYGPRWRMLRKLCSLQLFSTKALDDFQHARRGEVSRFVRRLAEANDRKNGSAATVDVSREIAACVGLVKRMKRLHRNFDDFLNKVIEDYRETTRSDNEKKASVDDGKGNEEGTNRTRNLLNVLLDLKENADGNDGSLNDIDIKALLQNVFAAGSDSTTITAEWALAELIQHPDVLARAQAELDDVVGRNRLVEESDLPNLPYLQAVLKETFRLHPPGPLSVPRMAVADCEVGGYLIPKGSNLLLNIWAIGRDPEAWPDKPLEFRPDRFLPGGRHEGVEVRG…
Vpla_KAG0497903.1	VplCYP75B6	MLPLLFKVLIINLLFYVLISSLGALRAVYYGERRAFPTLRHPLGCLSVQAQSPEVSPLPPGPRGLPLLGYLTKVGPNPHQTFYNLSKIYGPLLHLRFGIVDVVVPSSAEVAAKLFRNDLKVVNRPKNSGAEHILYNYQDIGFVPYGPRWRMLRKLCALHLFSPKALDDLQDTRREEMDLFVGELAGKGGAVEVDVSREVAKCVANSLSRLLIGRRVFDAGQEKEAGEFKWMVMELMHLSGSFCVADFLPGLGWLDPQGLISRMKKLNRRFDAFLNRFMAEHREPNAAGDNNNSGKRDLLSVMLEQQENADGEGGKLTDVDIKALLVAMFAAGSDSTSITSEWALAELIRKPEILARAQAELDSAVGRNRLVMESDLSNLPMLQDIVKETLRLHPPAPIS…
Maker09736	DchCYP75A1	MYLFLIMSLLLGLSLHLLLRRRHCSRLPLPPGPPNLPIIGALPFIGPMPHSGLALLARRYGPIMFLKMGIRRVVVASSSASARTFLKTFDSHFSDRPSGVISKEVSYNGQNMVFADYGPKWKLLRKVSSLHLLGSKAMSRWAGVRRDEAISMIQFLKKHSDSEKPVLLPNLLVCAMANVIGRIAMSKRVFHEDGEEAKEFKEMIKELLVGQGASNIEDLVPAIGWLDPMGVRKKMLGLNRRFDSMVSKLLAEHAETAGERQGNPDLLDLVVGSEAKGEDGEGLCEDNIKGFISDLFVAGTDTSAIVIEWAMAEMLKNPSILQRAQQETDRVIGRHRLLDESDIPNLPYLQAICKEALRKHPPTPLSIPHYASEPCDVEGYHIPGKTWLLVNIWAIGRDP…
Maker93966	DchCYP75A2	MYLFLIMSLLLGLSLHLLLRRRHCSRLPLPPGPPNLPIIGALPFIGPMPHSGLALLARRYGPIMFLKMGIRRVVVASSSASARTFLKTFDSHFSDRPSGVISKEVSYNGQNMVFADYGPKWKLLRKVSSLHLLGSKAMSRWAGVRRDEAISMIQFLKKHSDSEKPVLLPNLLVCAMANVIGRIAMSKRVFHEDGEEAKEFKEMIKELLVGQGASNIEDLVPAIGWLDPMGVRKKMLGLNRRFDSMVSKLLVEHAETAGERQGNPDLLDLVVGSEAKGEDGEGLCEDNIKGFISDLFVAGTDTSAIVIEWAMAEMLKNPSILQRAQQETDRVIGRHRLLDESDIPNLPYLQAICKEALRKHPPTPLSIPHYASEPCDVEGYHIPGKTWLLVNIWAIGRDP…
Maker59722	DchCYP75B1	MEVIDGGGKHRWQWWSMQKALQYRALAFIILVTLCTGNYESQAPKMAFIILFHFFFISLFLLSSHFLTGDDRRRLPLPPTPKGWPLLGNLLQLRSKPHRTLQILSRSHGSNGLLHLRLGTTTVIIISSASAATKCFRNHDVNLSSRPPNSVGKHIAYNFEDLVMAPYGLHWRMLRKICAIHLFSNKVLNNFQHVRDEEVVRLVHYLARREVAVDIGATVNTYVTNAMARIIVGRRVIVDGEMATKFKEMTAEISRLAGQFNGLNKKMKKSREKFGEFLEKIIAEHKLKAGDDHFNGSNHVKDFLSLLIEMNEDVHQVEKDKLTNINIKALLQDMFIAGTDTTSITVEWILVELIRHPHILARAQQELDSIVGRHRLICESDLSKFPFLHTIIKENFRLH…
Maker83891	DchCYP75B2	MKDEVGLRTSERKFSLYSIRSENRAKNQMAFLILVFLFVTFILTSVHLLSGNHRRRVHRRLPPGPKGWPIVGNLPQLGPKPHQTLHALSKTFGPILSLRFGSVDVVVASSAAAASQFLRTHDANFSNRPPNSGAEHVAYNYQDLVFAPYGARWRMLRRLCALHLFSAKAMEDFRDVRGGEVQQLVWELAKKAGEAVDVGGEVNACATNALTRATVGRRVFGGKDEREGAEEFKEMVVELMKLAGVFNIGDFVPGLAWLDLQSLHNELQGVVKKMKKLHRRFDEFFEGIIAEHREAEEKADSDGKRSDMLSILIGLKEEAAGEGIKLTDTDIKALLLNLFTAGTDTTSSTVEWALAELIRHPNLLKQAQIELDSVVGSDRLVSESDLPSLPFLQAIVKET…
Maker109076	DchCYP75B3	MALLIFVFIFVTFILTSLLLLSGNHRRRMRRLPPGPNGWPIIGNLPQLGPKPHQTLHALSKTFGPILSLRLGAFDVIVASSAAAASQFLRTHDANFSSRPPNSGAKHVAYNHQDLVFAPYGARWRTLRRLCTLHLFSSKAMEDFQHVRGGEVERLVRRIAEKGGEAVHVGGEVNTCVTNALTRVTVGRRVFGGNGEKEGAEEFKEMVVELLRLAGVFNIGDFVPGLGWLDLQGVVKKMKKLHRRFDEFFDGIIAEHRELAEEKADSDGKRSDMLSLLIGLKEEEAGGEGIKLTDTGIKALLLNLFVAGTDTTSSTVEWALAELLRHPNLLKQAQIELDSVVGSDRLVSESDLPNLPFLQAAVKETFRLHPSTPLSLPRIASKDCEIDGYLIPEGSTLLV…
Maker118630	DchCYP75B4	MALLLLIFTILLTSLFLLGAVAFQSLSSRRHRLPLPPGPKGWPLLGFLPKLGPNPHQIFHRLSKIHGPLLHLRFGVVDVVVPCSAAVAEKLLRNDMKFINRPKNSGAEHVAYNYQDIGFLPYGPRWRMQRKLCSLHLFSSKALDDFQDGRRTEFTRLVCRLAAQSVKADRNKEEAVVDISREVAACVGNSLSMLLLGRRVFDQDRPEVEEELRSMVMELMALTGSFCIADFLPGLRWFDPQASRMKKLNRKFDEFLNIFIAEHRAALAETTGPLITNSAVANKDLLTVMLQLQEINVDDEEGAKLTDIEIKALLLGLYAAGSDSNSILAEWALAELIRNPIILQRAQAELDSVVGGDRLVSESDLPNLPLLQAIVKETLRLHPPAPISLPRVAVEDCQV…
Maker118636	DchCYP75B5	MAILPLVLLPLLLLLSSVLLARALRARRPSKLPLPPGPKGSPIVGNLLQLGPKPHQTLYNLSKAHGPLIHLRFGFVDMIVVNSAATAAKILRNDANVCSRPTSTSVKHIAYNHQDLIFAHYGARWRMLRKICALQLFSPKAMEDLAPVRADEVGRFVRELAAEEEQFVNLSDGISACAADALSRVVVGRRVFGDGEESREFKDMVVEMMNLSTAFNINDFVPGLGWLDLQGLVGKMKKLHRKFDEFLDRVIEDHQTRLTETGKATASAGGGRGRHNDLLSVLIEAKEDANGDGIVLTDADIKPLLQNMFAAGTDTSSNTIEFVIAELIRHPDLLARAQQELDNVVGRRRLVAETDLPNLPFFQAVIKETFRHHPAAPLSLPRTISQDFEIDGYLIPKGA…
Dca000941	DcaCYP75A1	MSLFLIASLLLCLSLHLLLRRRYCSRLPLPPGPPNLPIIGALSFIGPMPHSGLALLARRYGPIMFLKMGIRSVVVASSAAAARTFLKTFDSHFSDRPSGVISKEISYNGQNMVFADYGPKWKLLRKVSSLHLLGSKAMSRWAGVRRDEALSMIQFLKKHSDSEKPVLLPNLLVCAMANVIGRIAMSKRVFHEDGEEAKEFKEMIKELLVGQGASNMEDLVPAIGWLDPMGVRKKMLGLNRRFDRMVRKLLVEHAETAGERRGNPDLLDLVLASEVKGEDGEGLCEDNIKGFISDLFVAGTDTSAIVIEWAMAEMLKNPSILRRAQEETDRVVGRHRLLDESDIPNLPYLQAICKEALRKHPPTPLSIPHYAADPCEVEGYHIPGKTWLLVNIWAIGRDP…
Dca000430	DcaCYP75B1	MAILPLVLLPLLLLLLSALLLARALRAHRTSKLPLPPGPKGSPIVGNLLQLGPKPHQTLYNLSKAHGPLIHLRFGFVDMIVVNSAATAAKILRNDANVCSRPTSTSVKHIAYNHQDLIFAHYGARWRMLRKICALQLFSPKAMEDLAPVRADEVGRFVRELAAAEVEEKFVNLSDGISACAADALSRVVVGRRVFGDGEESREFKEMVVEMMNLSTAFNINDFVPGLGWLDLQGLVGKMKKLHRKFDEFLDRVIEDHQVRLTETGKTIASAGGGRGRHNDLLSVLIEAKEDANGDGIALTDADIKPLLQNMFTAGTDTSSNTIEFAIAELIRHPDLLARAQQELDHVVGRRRLVAETDLPNLPFFQAVIKETFRHHPAAPLSLPRIISQDFEIDGYLIP…
Dca008242	DcaCYP75B2	MALLIFVFLFVTFILAFLRLLSGNHRRLPPGPKGWPIIGNLPQLGPKPHQTLHALSKTFGPIVSLRFGSVNVVVASSAAAASQFLRTQDANFSNRPPNSGAEHVAYNYQDLVFAPYGARWRMLRRLCALHLFSAKAMEDFRDVRRGEVDELVRELAKKVGEAVDVGGEVNTCATNALTRATVGRRVFGGKDEREGAEEFKEMVVELMKLAGVFNIGDFVPGLAWLDLQGVVKKMKKLHGRFDEFFDGIIAEHREAEEKADSDGKRSDMLSILIGLKEEAGREGIKLTDTDIKALLLNLFTAGTDTTSSTVEWALAELIRHPNLLKQAQIELDSVVGSDRLVSESDLPNLPFLQAVVKETFRLHPSTPLSLPRIASKDCDIDGYLIPKGSTLLVNVWSIA…
Dca013687	DcaCYP75B3	MAVLILFLLFFISILFLLSSLFLTGDDRRRHLPLPPGPKGWPLLGNLLQLNSKPHQTLQTLSRSHGSNGLLHLRLGTTTVIIISSSSAASKCFRNHDVNLSSRPPNSIGKHIAYNFQDLVMAPYGLRWRMLRKLFSAHLFSNKALNDFQYVRDEEVMRLVRDLAKRETTVVDIGEMVNSCVVNALARMIVGRRMIVEGEEATKFKEMATEMTRLAGQFNVGDFLPWIDWLDLQASSIMNHKLNKKMKKSREKFGEFLEKIIVEHKLKAEDDKFNGSSRVKDFLSLLIEMNEDVDDQVEQDKLTNINIKALLQDIFIAGTDTTSITIEWILAELIRHPHILARAKQELDSIVGLNRLISELDLPKFSFLHDIIKENFRLHPTVPLSVPRMAIKDCEIDGY…
Dca013688	DcaCYP75B4	MILILTLCLILAPILLSFIFLNRTADRHRRLPLPPGPKGWPLLGNLFQLGSNPTHQTLQTLSRSHGCDGLLHLRFGIVDVIVLSTASAVAKCFCNHDVNLSSRPLDSTGKLMAYNAQDLILAPYGRRWRMMRKICSSHLFSNKALNEFQDVRHGEVVRLVRDFAGRKAVVNVGEMVSICAVNALSLVLVGRRISAGDEEALQFKEMAIELTRLAGQPNIGDFLPWIDWLDLQGLTKKIKKSYGRFADFIEKIIVEHHRMNGDDQFKGRNHINDFLTKLIETKESAEGEEDKLTNINIKALLQDMFIAGTDTVSVAIEWILTELIRHPKLLARAQQEIDSIVGYNRLISESDLSKFSFLHCIVKESFRLHPPAPLSVPRMAIEDCVVDGFLIPKGATVLV…
Dca020470	DcaCYP75B5	MALLPLIFTILLTSLFLLAVAFQILSRRRHRLPLPPGPKGWPLLGFLPKLGPNPHQIFHRLSKIHGPLLHLRFGVVDVVVPCSAAVAEKLLRNDMKFINRPKNSGAEHVAYNYQDIGFLPYGPRWRMQRKLCALHLFSSKALDDFQDGRRTEFTRLVRRLAAQSVKANGNEEEAVVDISREVAACVGNSLSLLLLGRRVFDHDRPEVEEELRSMVMELMALTGSFCIADFLPGLRWFDPQGLIARMKKLNRKFDEFLNMFIAEHRAALAETTGPLITNNAVANKDLLTVMLKLQEINVDDEEGAKLTDIDIKALLMSLYAAGSDSNSILAEWALAELIRNPIILERAQAEVDSVVGRDRLVCESDLPNLPLLQAIVKETLRLHPPAPISLPRVAVEDCQ…
Dhu000016471	DhuCYP75A1	MSLFLIASLLLCLSLYLLLRRRNCSSLPLPPGPPNLPIIGALPFIGPMPHSGLALLARRYGPIMFLKMGIRRVVVASSSTAARTFLKTFDSHFSDRPSGVISKEISYNGQNMVFADYGPKWKLLRKVSSLHLLGSKAMSRWAGVRRDEALSMIQFLKKHSDSEKPVLLPNLLVCAMANVIGRIAMSKRVFHEDGEDAKEFKEMIKELLVGQGASNMEDLVPAIGWLDPMGVRKKMLGLNRRFDRMVSKLLVEHAETAGERQGNPDLLDLVVASEVKGEDGEGLCEDNIKGFISDLFVAGTDTSAIVIEWAMAEMLKNPSILRRAQEETDRVIGRHRLLDESDIPNLPYLQAICKEALRKHPPTPLSIPHYAADPCEVEGYQIPGKTWLLVNIWAIGRDP…
Dhu000016482	DhuCYP75A2	MSLFLIASLLLCLSLYLLLRRRNCSSLPLPPGPPNLPIIGALPFIGPMPHSGLALLARRYGPIMFLKMGIRRVVVASSSTAARTFLKTFDSHFSDRPSGVISKEISYNGQNMVFADYGPKWKLLRKVSSLHLLGSKAMSRWAGVRRDEALSMIQFLKKHSDSEKPVLLPNLLVCAMANVIGRIAMSKRVFHEDGEDAKEFKEMIKELLVGQGASNMEDLVPAIGWLDPMGVRKKMLGLNRRFDRMVSKLLVEHAETAGERQGNPDLLDLVVASEVKGEDGEGLCEDNIKGFISDLFVAGTDTSAIVIEWAMAEMLKNPSILRRAQEETDRVIGRHRLLDESDIPNLPYLQAICKEALRKHPPTPLSIPHYAADPCEVEGYQIPGKTWLLVNIWAIGRDP…
Dhu000012876	DhuCYP75B1	MAILPLVLLPLLLLLLSALLLARALRAHRPSKLPLPPGPKGSPIVGNLLQLGPKPHQTLYNLSKAHGPLIHLRFGFVDMIVVNSAATAAKILRNDANVCSRPTSTSVKHIAYNHQDLIFAHYGARWRMLRKICALQLFSPKAMEDLAPVRADEVGRFVRELAAAEEEKFVNLSDGISACAADALSRVVVGRRVFGDGEESKEFKEMVVEMMNLSTAFNINDFVPGLGWLDLQGLVGKMKKLHRKFDEFLDRVIDDHQVRLTETGKTTASAGGGRGRHNDLLSVLIEAKEDANGDGMVLTDADIKPLLQNMFAAGTDTSSNTIEFVIAELIRHPDLLARAQQELDNVVGRRRLVAETDLPNLPFFQAVIKETFRHHPAAPLSLPRIISQDFEIDGYLIPK…
Dhu000016330	DhuCYP75B2	MALLIFVFLFVTFILAFVRLLSGNQRRRVHRRLPPGPKGWPIIGNLPQLGPKPHQTLHALSKTFGPILSLRFGSVDVVVASSAAAASQFLRTQDANFSNRPPNSGAEHVAYNYQDLVFAPYGARWRMLRRLCALHLFSSKAMENFRDVRGGEVDELVRELTKKVGEAVDVGGEVNTCATNALARATVGRRVFGGKDEREGAEEFKEMVLELMKLAGVFNIGDFVPGLAWLDLQGVVKKMKKLHGRFDEFFDGIIAEHREAEEKADSDGKRSDMLSILIGLKEEAGGEGIKLTDTDIKALLLNLFTAGTDTTSSTVEWALAELIRHPNLLKQAQIELDSVVGSDRLVSESDLPNLPFLQAIVKETFRLHPSTPLSLPRIASKDCEIDDYLIPEGSTLLVN…
Dhu000019542	DhuCYP75B3	MALLPLIFTILLTSLFLLAVAFQILSRRRHRLPLPPGPKGWPLLGFLPKLGPNPHQIFHRLSKIHGPLLHLRFGVVDVVVPCSAAVAEKLLRNDMKFINRPKNSGAEHVAYNYQDIGFLPYGPRWRMQRKLCAHHLFSSKALDDFQDGRRTEFTRLVRRLAAQSVKANGNEEEAVVDISREVAACVGNSLSLLLLGRRVFDHDRPEVEEELRSMVMELMALTGSFCIADFLPGLRWFDPQGLIARMKKLNRKFDEFLNMFIAEHRAALAETTGPLITNNAVANKDLLTVMLKLQEINVDDEEGAKLTDIDIKALLMSLYAAGSDSNSILAEWALAELIRNPIILERAQAEVDSVVGRDRLVCESDLPNLPLLQAIVKETLRLHPPAPISLPRVAVEDCQ…
Dhu000020018	DhuCYP75B4	MPNPSRNRKEKMGREDEHIRVVKLGYKEAVLDGNHEEEATWANMIDDLLKRREYFEGLRWLQIDYKWLSRMYGPFLKVYDDHYSVLRAIDGEKLQSDDDEHSFSPWMVFLATGLDVILLIAGDDRRRHLPFPPGPKGWPLLGNLLQLNTKPHQTLQTLSRSHGSNGLLHLRLGTTTVIIISSSSAAAKCFRNHDVNLSSRPPNSIGKHIAYNFQDLVMAPYGLRWRMLRKLFSTHLFSNKALNDFQYVRDEEGLNKKMKKSREKFGEFLEKIIVEHKLKAGDDKFNGSTRVKDSLSLLIEMNEDVDQVEQDKLTNINIKALLQDIFISGTDTTSITIEWILAELIRHPHILARAKQELDSIVGLNRLISELDLPKFSFLHAIIKENFRLHPTVPLSVPR…
PGU007087	PguCYP75B1	MIIITLLLLTFLFLSGLLLLTGGFHRRRKTKLPLPPGPKGSPILGNLLQLGPKPHETIYTLSKSYGPLVSLRFGSVDMIIVNSAAAAAGILRNDNNFSSRPSSTSVKYIAYNHQDLIFAHYGARWRMLRKICALQLFSPKAMEDLVPVRADEVGRFVRKIAASGRRDEAVNLSDEISACATNALSRVVVGRRVFGDGEETKEFKEMVADMMNLSAAFNINDFVPGFGWLDIQGLVPRMKKLHKRFDDFLEKVIAEHRERLTEKGAAEVVGGGRGRHNDLLSVLLEVKQDGNGEGVALTDADIKPLLQNMFAAGTDTSSNTTEFAIAELIRHPEIMARAQQELDRVVGRRRLVRESDLPNLPFLQAVVKETFRHHPAAPLSLPRTVDEDYEVDGYVIPKG…
PGU010950	PguCYP75B2	MAALPLVFTTIILSTIFLFLLNRRRTRRRKPLPPGPKGWPLLGFLPELGPQPHKTFHRLSKTHGPLLHLRLGVVDVVVPSSAAMAEKLLRNDMKFINRPRNSGAEHIAYNHRDIGFLPYGPGWRMQRKLCAQHLFSSKALDEFQDTRRREFTGLVRRLAAQRAENLESPVDVSREIAACVGNSLSLLLIGRRLFDGGPEVEELRSMVMELMALTGSFCIVDFLPGLRWLDPQGLIARMKKLNRKFDKLLDRIIAEHRATLMAGGAEYDRRPGAMDLLSVILQLKEDADGEGGNLSDTDIKASLLTMYAAGSDSNSILAEWALSELIRSPVLLARAQAELDSVVGRSRLVSELDLPHLPLLQAIIKETLRLHPPAPISLPRVAVEDCEIDGYLIPKGTTL…
PZI001224	PziCYP75A1	MLPIFICSLLLSLAIHLFLLRRHRRRLPPGPPNFPILGALPLIGPMPHSGLARLAARHGPIMFLKMGLRPVVVASSSAAARSFLKTLDAQFSDRPAGVMSKQVSYNGQDMVFADYGPGWRLLRKISSIHLLGGKAMARWGDVRRDEVRHMLQFLRKQGEFGIPVTISDLLVRSMANVIGEIVMSKRVFDEEGKEAKAFKEMIKGLLVGQGSSNIGDLIPAIGWLDLLGVRKKMMGLHRQFDEMISRLLSEHAATAGRRRERPDLLDLIAAGKVAGENGADELSEVNIKGFIADLFVAGTDTSAIVIEWAMTEMLRNPQILRRAQEEADRVVGRHRLLEESDIPNLPYLQAVCKEALRKHPPTPLSIPHYTSEPCEVDGYEIPGKTWLLVNIWAIGRDPV…
PZI012105	PziCYP75B1	MIIITLLLLLTFLFLSALLLTGGFHRRRKTKLPLPPGPKGSPILGNLLQLGPKPHETIYTLSKTYGPLVSLRFGSVDMIIVNSAAAAAGILRNDNNFSSRPSSTSVKYIAYNHQDLIFAHYGARWRMLRKICALQLFSPKAMEDLVPVRADEVGRFVRKIAASGGRDEAVNLSDEISACATNALSRVVVGRRVFDDGEETKEFKEMVADMMNLSAAFNINDFVPGFGWLDIQGLVPRMKKLHKRFDDFLEKVIAEHRERLTEKGAAGVVGGGRGRHNDLLSVLLEVKQDGNGEGVALTDADIKPLLQNMFAAGTDTSSNTTEFAIAELIRHPEIMARAQQELDRVVGRRRLVKESDLPNLPFLQAVVKETFRHHPAAPLSLPRTVDEDHEVDGYIIPKG…
PZI015225	PziCYP75B2	MAILFLLLLSTLLIVSILFSAKRRSLPNRRPPFPPGPKGWPVLGNLPQLGSKPHQTLHSLSQKYGPLLGLRLGHVHVVVASSASTAAMFFRTHDANFSSRPPNSGAEHVAYNYQDLVFAPYGERWRMLRRLCALNLFSAKAMEDFGHVRAGEVARLVWGLKTAQAAVNVGGEVNECATNALSLVLLGRRVFGGRRDEDQAAAEEFKELVVELMKLAGVFNVGDFVHGLGWLDLQGVVSKMKKLHKKMDKYFCKIMEEHKEKDDGNGKASRDVLSIFMKLKDESNEDGGFTDTHIKALLLNLFTAGTDTTSSTVEWALAELIQQPSLMAEAQAEIDSIAGRSRLVSESDLPNLPLLRAIVKETLRLHPSTPLSLPRVAAEGCEIAGYSIPKGATLLVNIW…
Ash019093	AshCYP75A1	MDLYLISSVFLCFLIHLLIRRRLLPRRFLPLPPGPFNFPILGALPFIGPMPYSGLARLAHRYGPIMFLKMGTRRVVVASSPAAARTFLKTLDAAFSDRPSGVLSKEVAYNGRDMVFSDYNPNWKLLRKVTSLHLLGPKAMARWAAVRQDEAGRMLDSMLKLSVAGKPVTMPDLLVCTLANVIGRITVSQRVFDEEGKESKAFKEMIMELLVGEGASNIGDLVPAIRWLDPMTKKMWRIHHKLDRMLTELLTEHATTSLERRQSPDFIDLILADQPEGEDGEKLSLDSIKGLIADLFVAGTDTSSIVIEWAMAEMLRNPAILRRAQEEADSVIGRNRLLEESDIPNLPYLQAICKEALRKHPSTPLSIPHFSKEPCEIEGYRIPGETWLLVNIWAIGRHP…
Ash001251	AshCYP75B1	MAPLVLLILIFFLTTPLIIHSRKKRKGRLPLPPGPMGFPLLGYLPKLGPNPHRTFHSLSKTYGPLLSLRLGVVQVIVPCSAAAAAKLFRNDIHVINRPKNSSAEHITYDSHDIGFIPYGAQWRMMRKLCALQLFSPKALDDFQHARCAVVTRLVRELAGVSGDGKGARLPGEAVDMSREVAKCVANSLSQLLIGRTVFEEGQEKEAGEFKEMVVELMFLTGSFCPADFLPGLGWLDPQGLIGRMKALHRRFDRFLDRFVAEHREARVAGNDGSRGAQDLLSVLLELQEDEDGEGGKLTDTDIKALLLALFAAGSDGTSSTSEWALAELIRNPDLLARVQSELDSVVGRRRLVAESDLPHLPLLQAVVKETLRLHAPAPLSIPRMAVDDIEVDGRLIPAG…
Ash004102	AshCYP75B2	MAVALAVFLLATFLFSFFLLAGGNRRRRRTGSLPLPPGPTGWPVLGNLLQLGPKPHETLYALSKIYGPLFRLRLGTVDVIVPCSAAVAAKILRNDANFSNRPTNSSVKHLAYNHQDLIFTQYGPRWRMLRKLCALQLFSPKAMEDLRPVRASEVKSMVQKLAAAGREVQMVDMSHEISACATNALSRVVVGRRVFDHGEEAKEFKDMIEEAMNLSGAFNIGDFVPGIGWLDLQGLVTRMKKIHKKFDEFLDKVIADHRVTPMNKEMADGDAGSSHNDLLSVVLEQVKENTLGERVALKDQDVKPLFQNMFAAGTDTSSNTVEFVIAELIRHPSLLARAQQELDAVVGRSRLVSEHDLPNLPFLYAVVKETFRHHPAAPLSLPRLVSEDCEVDGCLIPAG…
Ash007554	AshCYP75B3	MAPVLLLLFSFLLACLLVAGAGRKGSRSSRRLPLPPGPKGWPFLGNLPQLGPKPHQTFHALSKTHGPLLHLRLGSLHAVVPSTADLAEKLLRNDMKFINRPKNSGAEHIAYNYQDLGFTPYGPRWRMLRKLCAQHLFSARALDELQHVRRREVAAFVRRLAAAGGPPVDVSREVAACVVNALAQLLVGRRVFDDDAGEDAREFKDMVTELMYLAGSFNVGDFVPWLRWLDLQGLEARMKKLHRKFDGFLDGVIADHPASGSAAAGEDVRIPAARDLLSVLIELKDDADGDGGKLTNIDIKALLQNIFAAGSDSTSITSEWALAELIRHPDVLSRAQEELDAVVGCGRLVSESDLPNLPFLQAVVKETFRLHPPGPLSVPRIAVEDCEVDGYLIPKGATL…
Ash015225	AshCYP75B4	MLHILLLIVFTLFLASFFLSGDRSRRLPPGPKGWPLLGNLPQLGPKPHQTLHSLSKFYGPVLRLRFGAVDVAVASSAAVAENFLRVHDSNFSSRPPSSGAKHIAYNCQDLVFAPHGERWRTLRRMCALHLFSGRALERFRHVRAGEVARMVRGLAAASSPEGTVAGVDVGGMVNACAANALGLAVVGRRVFDDADCGAEEFEGMVVELMKVAGVFNVGDFVPCLDWLDLQGVVAKMKKLHRRFDEFLDKLIAEHRALTNERDMLSMMIRLKKEEEEEEDRNGGMLTDTNIKALLLNLFTAGTDTTSSTVEWALAQLIREPGLLFKAQNELDSVVGRARLVSESDLPNLPFLQSVVKETFRLHPPTPLSLPRIAAADCEVDGYLIRRGSTLLVNVYAIGR…
Gel004675	GelCYP75A1	MEFEGIRFGWASPPGTPLVLIGSLLLCLSLRFLLLRRRRLPPGPLNLPIVGALPFIGPNPHSGLARLARRHGPIMFLRMGVRRVVVASSSAAARLFLKTLDASFADRPPGVMSKEITLNGRDLVFADYGPEWKLLRRFSAVHLLGSTAMARWADLRRDEATSMLRFLRDRSDSGNPVLLPDALIRAMANVIGRIALSKRVFEDEGEESKDFQEMIKEILAGQATSNIADLLPALKFLDPSGARKKMRDLNRRLIGKISELMREHAKSAGERQGKNVDLLDLIRANKLVGDSGEELPQEYTRNFILDLFVAGTDTSAIVIEWAMAEMLKNPIIFERAHEEMDRVIGRDRLLEESDIPNLPYLQAICKEALRKHPPTPLSIPHYTSEPCEAEGFHIPGGTW…
Gel010620	GelCYP75B1	MSHPPLLHAALLIAALLLLSLWRRRVRRRGPPLPPGPAGWPVLGFLPKMGPNPHRLFHGLSAKYGPLVHVRLGRVHVVVPSSAAAAEKLLRNDAYFANRPRNSGAEHIAYNSRDIGFLPYGPRWRMQRRLCALHLFSSKAMDEFQDGRRAELGRLVRRLAAGDGEPVDVGREVAACIGNSLSLLLFGRRAFDDGSGADGELRSMVTELMALTGSFCVVDFLPGLSWLDPQGTIGRMKKLNRRFDGFLSKFMEEHRASSRHTKDLLSVLLELQQQMTANDDQEAPHLTDTDIKALLMALYAAGSDSSSILAVWALAEVIRSPGVAARAQAELDAVVGRNRLLSESDIPNLPFLQAVVKETLRLHPPAPLSLPRVAVEDCHVDGYLIPKGATLLLNIWAIG…
Gel016567	GelCYP75B2	MWSILLLVLLLPLTCALLLRSIRRRGAKKKLPLPPAPKGMPILGNLLQLGPNPHQTIYALSKSHGPLIRLRFGFVDMIVANSASVASKILRNDANVCSRPSSSSVRHIAYNHKDLIFAPYGPRWRMLRKLCALQLFAPKAMDDLSPVRASEIRRFVTHLLAQSSTVAVNLSDGISACAADALSRVVVGRRVFGDGDESKDFKDMVEDMMNLSAAFNINDFIPGLGWLDLQGLVRKMKRLHRKFDAFLDRVIAEHRERLMLDRASPASGRGRHNDLLSLLIEAKEDASNGEGIALTDADIKPLLQNMFAAGTDTSSNTIEFAMAELIRHPELLGRAQEELDRVVGRRRLVAETDIPKLPFLQAVIKETFRHHPAAPLSLPRIVSQDFELDGHLVPKGSTL…
Gel005429	GelCYP75B3	MVWLLCVIISSILLLQISGGRKGKEGAALPPGPTGWPIIGNFLQLGLKPHRSLQALAELHGPILRLRLGSKEVIVASTAAAAELFLRTHDDKFCGRPHLAFGEVVLYGTQDLVLAPHGPKWRLLRKLCATHMFSAKALDDFQHVREEETGRMALGMAADSAPARVLDAVKACATNVLVRTLIGERLLERDFHRMLSDVNKLSHAFFPGDFFPRWIDFQGVLSKMKNVHRRFDNYFNRIIEEHLQEMKKFNGSSLQKSRNLLTCLLEIEDSQWEGGDYDAKITRTNIKALLLDMLVAGLETTSNTIEWALSELIRQPELLARAQCELDSVAGSSRMVTESDLPNLPLLQAIVKESLRLHPAVALNAPLSAIEDCQVESFSIPKGMVLFVNIWAIGRDPAL…
BAJ93256.1		RSGMEIPLPLLLSTLAISVTICYVIFFFFRSDKGCAPLPPGPRGWPVLGNLPQLGGKTHQTLHEMTRLYGPMFRLWFGSSLVVVAGSADMAKLFLRTHDAKFSSRPPNSGGEHMAYNYQDVVFAPYGPRWRAMRKVCAVNLFSARALDDLHSFREREAALMVRCLADSAAVGRVVALAKAANVCTTNALSRATVGLRVFATAGSELGAEDFNEIVLKLIEVGGILNVGDFVPALRWLDPQGVVAKMKKLHRRFDDMMNRIIAQRRAVSTTAGKDLLALLLAMVQEDKSLTGVEEDKIRDTDVKALILNLFVAGTDTTSITVEWAMAELIRHPHILKQAQEELDAVVGRDRLVLESDLPHLTFLNAVIKETFRLHPSTPLSLPRMAIEECEVAGHRIPKG…
AT5G07990.1		MATLFLTILLATVLFLILRIFSHRRNRSHNNRLPPGPNPWPIIGNLPHMGTKPHRTLSAMVTTYGPILHLRLGFVDVVVAASKSVAEQFLKIHDANFASRPPNSGAKHMAYNYQDLVFAPYGHRWRLLRKISSVHLFSAKALEDFKHVRQEEVGTLTRELVRVGTKPVNLGQLVNMCVVNALGREMIGRRLFGADADHKADEFRSMVTEMMALAGVFNIGDFVPSLDWLDLQGVAGKMKRLHKRFDAFLSSILKEHEMNGQDQKHTDMLSTLISLKGTDLDGDGGSLTDTEIKALLLNMFTAGTDTSASTVDWAIAELIRHPDIMVKAQEELDIVVGRDRPVNESDIAQLPYLQAVIKENFRLHPPTPLSLPHIASESCEINGYHIPKGSTLLTNIWAI…
XP_015613041.1		MDVVPLPLLLGSLAVSAAVWYLVYFLRGGSGGDAARKRRPLPPGPRGWPVLGNLPQLGDKPHHTMCALARQYGPLFRLRFGCAEVVVAASAPVAAQFLRGHDANFSNRPPNSGAEHVAYNYQDLVFAPYGARWRALRKLCALHLFSAKALDDLRAVREGEVALMVRNLARQQAASVALGQEANVCATNTLARATIGHRVFAVDGGEGAREFKEMVVELMQLAGVFNVGDFVPALRWLDPQGVVAKMKRLHRRYDNMMNGFINERKAGAQPDGVAAGEHGNDLLSVLLARMQEEQKLDGDGEKITETDIKALLLNLFTAGTDTTSSTVEWALAELIRHPDVLKEAQHELDTVVGRGRLVSESDLPRLPYLTAVIKETFRLHPSTPLSLPREAAEECEVDG…
AUB13331.1		MVLHYLTGVILRAKRAPLPLPPGPRGYPVVGALPLLGRAPHRALAALARLHGPIMHLTLGRQGLVVASTPESARLLLKDHGGSFLDRPVDDAAPMVLAYGAQDIVFAPYGPKWRRLRRECSAGLLGSKALDDWADTRHEEVGRMVRAMSRRGEALEVPEFLFGAMANMIGQAVVGRRVLDEDDGEATREFQEMVVELMTTAGLVNIGDFVPAVAWMDLQGLGRRMRRLTTRLDRAWSRLLVDHEVAMANRKQDGNSRTDLVDRLIACRGYAEEDGVTDFNIKAVLNNLFTAGTDTSSSTIEWALAEMMVNSAILQQAQAEMDEVVGRDRLLQESDIRHLPYLRAICKETFRKHPSTPLNLPRVSTEPCKVQGYYIPKGTRLVVNIWAIGRDPAVWPEPG…
ABI95365.1		MSIFLITSLLLCLSLHLLLRRRHRSRFPLPPGPPNLPILGALPFIGPMPHSGLALLARRYGPIMFLKMGIRRVVVASSATAARSFLKTFDSHFSDRPSGVISKEISYNGQNMVFADYGPKWKLLRKVSSLHLLGSKAMSRWAGVRRDEAFSMIQFLKKHSDTEKPVLLPNLLVCAMANVIGRIAMSKRVFDEEGEEAKEFKEMIKELLVGQGASNIGDLVPSIGWLDPMGVKKRMLGLNRRFDRMVSKLLVEHAETAGERQGNPDLLDLVVGSELTGEDGEGLCEDNIKGFISDLFVAGTDTSAIVIEWAMAEMLKNPSILQRAQQETDRVVGRHRLLDESDIPKLPYLQAICKEALRKHPPTPLSIPHYASEPCEVEGYHIPGKTWLLVNIWAIGRDP…
AAZ79451.1		MSIFLIATLFLSLSLHLLLRRFRRRRRILPLPPGPLNFPIVGALPFIGSMPHSGLALLSRRYGPIMFLKMGIRQVVVASSSSAARSFLKTHDSRFSDRPLDIISKQVSYNGQNMVFADYGPKWKLLRKVSNLHLFGPKAMSRWADVRRDEAFSMSHFLKKQSDSKNPVLLSNLLVCSMANVIGRISMSKRVFDEEGKEAKEFKEIIKELLVGQGASNIGDLVPAMRWLDPQGARKKLLGLNQRFVRMISKFLAEHGESRGEREGNPDLLDLIVADKIAGDDGEGLSEENIKGFISDLFVAGTDTSAMVIEWAMAEMLKNPAILRRVQEETDRIVGRDRLLEESDIPNLPYLQAICKEALRKHPPTPLSIPHYASEPCEVEGYHIPGKTWLLVNIWAIGR…
AEB96145.1		MSIFLITSLLLCLSLHLLLRRRHISRLPLPPGPPNLPIIGALPFIGPMPHSGLALLARRYGPIMFLKMGIRRVVVASSSTAARTFLKTFDSHFSDRPSGVISKEISYNGQNMVFADYGPKWKLLRKVSSLHLLGSKAMSRWAGVRRDEALSMIQFLKKHSDSEKPVLLPNLLVCAMANVIGRIAMSKRVFHEDGEEAKEFKEMIKELLVGQGASNMEDLVPAIGWLDPMGVRKKMLGLNRRFDRMVSKLLVEHAETAGERQGNPDLLDLVVASEVKGEDGEGLCEDNIKGFISDLFVAGTDTSAIVIEWAMAEMLKNPSILRRAQEETDRVIGRHRLLDESDIPNLPYLQAICKEALRKHPPTPLSIPHYASEPCEVEGYHIPGETWLLVNIWAIGRDP…
AF155332.1		MEILSLILYTVIFSFLLQFILRSFFRKRYPLPLPPGPKPWPIIGNLVHLGPKPHQSTAAMAQTYGPLMYLKMGFVDVVVAASASVAAQFLKTHDANFSSRPPNSGAEHMAYNYQDLVFAPYGPRWRMLRKICSVHLFSTKALDDFRHVRQDEVKTLTRALASAGQKPVKLGQLLNVCTTNALARVMLGKRVFADGSGDVDPQAAEFKSMVVEMMVVAGVFNIGDFIPQLNWLDIQGVAAKMKKLHARFDAFLTDILEEHKGKIFGEMKDLLSTLISLKNDDADNDGGKLTDTEIKALLLNLFVAGTDTSSSTVEWAIAELIRNPKILAQAQQEIDKVVGRDRLVGELDLAQLTYLEAIVKETFRLHPSTPLSLPRIASESCEINGYFIPKGSTLLLNVW…
AtCYP76C1		MDIISGQALLLLFCFILSCFLIFTTTRSGRISRGATALPPGPPRLPIIGNIHLVGKHPHRSFAELSKTYGPVMSLKLGSLNTVVIASPEAAREVLRTHDQILSARSPTNAVRSINHQDASLVWLPSSSARWRLLRRLSVTQLLSPQRIEATKALRMNKVKELVSFISESSDREESVDISRVAFITTLNIISNILFSVDLGSYNAKASINGVQDTVISVMDAAGTPDAANYFPFLRFLDLQGNVKTFKVCTERLVRVFRGFIDAKIAEKSSQNNPKDVSKNDFVDNLLDYKGDESELSISDIEHLLLDMFTAGTDTSSSTLEWAMTELLKNPKTMAKAQAEIDCVIGQNGIVEESDISKLPYLQAVVKETFRLHTPVPLLIPRKAESDAEILGFMVLKDT…
AtCYP73A5		MDLLLLEKSLIAVFVAVILATVISKLRGKKLKLPPGPIPIPIFGNWLQVGDDLNHRNLVDYAKKFGDLFLLRMGQRNLVVVSSPDLTKEVLHTQGVEFGSRTRNVVFDIFTGKGQDMVFTVYGEHWRKMRRIMTVPFFTNKVVQQNREGWEFEAASVVEDVKKNPDSATKGIVLRKRLQLMMYNNMFRIMFDRRFESEDSPLFLRLKALNGERSRLAQSFEYNYGDFIPILRPFLRGYLKICQDVKDRRIALFKKYFVDERKQIASSKPTGSEGLKCAIDHILEAEQKGEINEDNVLYIVENINVAAIETTLWSIEWGIAELVNHPEIQSKLRNELDTVLGPGVQVTEPDLHKLPYLQAVVKETLRLRMAIPLLVPHMNLHDAKLAGYDIPAESKILVN…
AtCYP706A1		MSTLPLFSLHHHTTQNLQTNNQNTVRYFSLKPKMETASSNFSLSQILNIEEPYSSVMLGVAALLAVVCYFWIQGKSKSKNGPPLPPGPWPLPIVGNLPFLNSDVLHTQFQALTLKHGPLMKIHLGSKLAIVVSSPDMAREVLKTHDITFANHDLPEVGKINTYGGEDILWSPYGTHWRRLRKLCVMKMFTTPTLEASYSTRREETRQTIVHMSEMAREGSPVNLGEQIFLSIFNVVTRMMWGATVEGDERTSLGNELKTLISDISDIEGIQNYSDFFPLFSRFDFQGLVKQMKGHVKKLDLLFDRVMESHVKMVGKKSEEEEDFLQYLLRVKDDDEKAPLSMTVKSLLMDMVLGGVDTSVNASEFAMAEIVSRPEVLNKIRLELDQVVGKDNIVEESHL…

## Sheet: Table S4
Table S4. Cis-acting elements in the 2k bp of upstream and downstream regions of CgCYP75s.
The upstream 2k bp of CgCYP75s.
ID	Length	Name	Function
CgCYP75A1	1566	GATA-motif	Light responsive element
CgCYP75A1	137	MBS	MYB binding site
CgCYP75A1	1307	MBS	MYB binding site
CgCYP75A1	24	GA-motif	Light responsive element
CgCYP75A1	963	GA-motif	Light responsive element
CgCYP75A1	512	Box 4	Light responsive element
CgCYP75A1	757	Box 4	Light responsive element
CgCYP75A1	1121	Box 4	Light responsive element
CgCYP75A1	1263	Box 4	Light responsive element
CgCYP75A1	1657	Box 4	Light responsive element
CgCYP75A1	1828	Box 4	Light responsive element
CgCYP75A2	1479	Sp1	Light responsive element
CgCYP75A2	1366	CGTCA-motif	MeJA-responsiveness
CgCYP75A2	1421	CGTCA-motif	MeJA-responsiveness
CgCYP75A2	1366	TGACG-motif	MeJA-responsiveness
CgCYP75A2	1421	TGACG-motif	MeJA-responsiveness
CgCYP75A2	1859	I-box	Light responsive element
CgCYP75A2	1515	CCAAT-box	MYB binding site
CgCYP75A2	1611	CCAAT-box	MYB binding site
CgCYP75A2	1751	TCT-motif	Light responsive element
CgCYP75A2	333	Box 4	Light responsive element
CgCYP75A2	475	Box 4	Light responsive element
CgCYP75A2	857	Box 4	Light responsive element
CgCYP75A2	1027	Box 4	Light responsive element
CgCYP75A2	1364	ABRE	Abscisic acid responsiveness
CgCYP75A2	1364	G-box	Light responsive element
CgCYP75A2	1302	GATA-motif	Light responsive element
CgCYP75A2	1731	GATA-motif	Light responsive element
CgCYP75A2	1921	GATA-motif	Light responsive element
CgCYP75A2	1988	GARE-motif	Gibberellin-responsive element
CgCYP75A2	178	GA-motif	Light responsive element
CgCYP75A2	519	MBS	MYB binding site
CgCYP75B1	1814	ARE	Anaerobic induction
CgCYP75B1	1107	MRE	MYB binding site
CgCYP75B1	424	CGTCA-motif	MeJA-responsiveness
CgCYP75B1	993	ATC-motif	Light responsive element
CgCYP75B1	1734	GT1-motif	Light responsive element
CgCYP75B1	424	TGACG-motif	MeJA-responsiveness
CgCYP75B1	1622	TCT-motif	Light responsive element
CgCYP75B1	1256	Box 4	Light responsive element
CgCYP75B1	1394	Box 4	Light responsive element
CgCYP75B1	1518	Box 4	Light responsive element
CgCYP75B1	1979	Box 4	Light responsive element
CgCYP75B1	351	ABRE	Abscisic acid responsiveness
CgCYP75B1	629	ABRE	Abscisic acid responsiveness
CgCYP75B1	640	ABRE	Abscisic acid responsiveness
CgCYP75B1	951	ABRE	Abscisic acid responsiveness
CgCYP75B1	952	ABRE	Abscisic acid responsiveness
CgCYP75B1	1101	ABRE	Abscisic acid responsiveness
CgCYP75B1	951	G-Box	Light responsive element
CgCYP75B1	886	GATA-motif	Light responsive element
CgCYP75B1	350	G-box	Light responsive element
CgCYP75B1	519	G-box	Light responsive element
CgCYP75B1	629	G-box	Light responsive element
CgCYP75B1	639	G-box	Light responsive element
CgCYP75B1	951	G-box	Light responsive element
CgCYP75B1	1101	G-box	Light responsive element
CgCYP75B1	740	AE-box	Light responsive element
CgCYP75B1	981	AE-box	Light responsive element
CgCYP75B1	398	LTR	Low-temperature responsiveness
CgCYP75B2	430	ABRE	Abscisic acid responsiveness
CgCYP75B2	913	ABRE	Abscisic acid responsiveness
CgCYP75B2	1533	ABRE	Abscisic acid responsiveness
CgCYP75B2	1285	P-box	Gibberellin-responsive element
CgCYP75B2	1432	LTR	Low-temperature responsiveness
CgCYP75B2	4	TGACG-motif	MeJA-responsiveness
CgCYP75B2	439	TGACG-motif	MeJA-responsiveness
CgCYP75B2	521	TGACG-motif	MeJA-responsiveness
CgCYP75B2	922	TGACG-motif	MeJA-responsiveness
CgCYP75B2	1004	TGACG-motif	MeJA-responsiveness
CgCYP75B2	1664	TGACG-motif	MeJA-responsiveness
CgCYP75B2	1944	I-box	Light responsive element
CgCYP75B2	1310	TCCC-motif	Light responsive element
CgCYP75B2	399	ARE	Anaerobic induction
CgCYP75B2	882	ARE	Anaerobic induction
CgCYP75B2	1752	Sp1	Light responsive element
CgCYP75B2	4	CGTCA-motif	MeJA-responsiveness
CgCYP75B2	439	CGTCA-motif	MeJA-responsiveness
CgCYP75B2	521	CGTCA-motif	MeJA-responsiveness
CgCYP75B2	922	CGTCA-motif	MeJA-responsiveness
CgCYP75B2	1004	CGTCA-motif	MeJA-responsiveness
CgCYP75B2	1664	CGTCA-motif	MeJA-responsiveness
CgCYP75B2	1975	Box 4	Light responsive element
CgCYP75B2	1988	Box 4	Light responsive element
CgCYP75B3	293	Box 4	Light responsive element
CgCYP75B3	597	Box 4	Light responsive element
CgCYP75B3	1195	Box 4	Light responsive element
CgCYP75B3	1938	AuxRR-core	Auxin responsiveness
CgCYP75B3	466	ATCT-motif	Light responsive element
CgCYP75B3	783	TCT-motif	Light responsive element
CgCYP75B3	1276	TCT-motif	Light responsive element
CgCYP75B3	1474	TCT-motif	Light responsive element
CgCYP75B3	1045	TC-rich repeats	Defense and stress responsiveness
CgCYP75B3	772	LTR	Low-temperature responsiveness
CgCYP75B3	1961	GARE-motif	Gibberellin-responsive element
CgCYP75B3	644	ARE	Anaerobic induction
CgCYP75B4	1709	TGACG-motif	MeJA-responsiveness
CgCYP75B4	1738	TGACG-motif	MeJA-responsiveness
CgCYP75B4	1828	TGACG-motif	MeJA-responsiveness
CgCYP75B4	1630	ATC-motif	Light responsive element
CgCYP75B4	1286	Sp1	Light responsive element
CgCYP75B4	1502	Sp1	Light responsive element
CgCYP75B4	1767	Sp1	Light responsive element
CgCYP75B4	1709	CGTCA-motif	MeJA-responsiveness
CgCYP75B4	1738	CGTCA-motif	MeJA-responsiveness
CgCYP75B4	1828	CGTCA-motif	MeJA-responsiveness
CgCYP75B4	400	Box 4	Light responsive element
CgCYP75B4	1143	AuxRR-core	Auxin responsiveness
CgCYP75B4	1293	CCAAT-box	MYB binding site
CgCYP75B4	1426	CCAAT-box	MYB binding site
CgCYP75B4	250	TC-rich repeats	Defense and stress responsiveness
CgCYP75B4	481	TCT-motif	Light responsive element
CgCYP75B4	679	TCT-motif	Light responsive element
CgCYP75B4	1166	GARE-motif	Gibberellin-responsive element
CgCYP75B4	1482	G-box	Light responsive element
CgCYP75B4	1671	G-box	Light responsive element
CgCYP75B4	1729	G-box	Light responsive element
CgCYP75B4	1730	G-box	Light responsive element
CgCYP75B4	1214	G-Box	Light responsive element
CgCYP75B4	1644	G-Box	Light responsive element
CgCYP75B4	1730	G-Box	Light responsive element
CgCYP75B4	1214	ABRE	Abscisic acid responsiveness
CgCYP75B4	1645	ABRE	Abscisic acid responsiveness
CgCYP75B4	1730	ABRE	Abscisic acid responsiveness
CgCYP75B4	1731	ABRE	Abscisic acid responsiveness
CgCYP75B5	1567	ABRE	Abscisic acid responsiveness
CgCYP75B5	1567	G-box	Light responsive element
CgCYP75B5	978	TGA-element	Auxin responsiveness
CgCYP75B5	453	MBS	MYB binding site
CgCYP75B5	871	GT1-motif	Light responsive element
CgCYP75B5	960	CGTCA-motif	MeJA-responsiveness
CgCYP75B5	1916	CGTCA-motif	MeJA-responsiveness
CgCYP75B5	1679	AT1-motif	Light responsive element
CgCYP75B5	960	TGACG-motif	MeJA-responsiveness
CgCYP75B5	1916	TGACG-motif	MeJA-responsiveness
CgCYP75B5	1266	ATCT-motif	Light responsive element
CgCYP75B6	787	ABRE	Abscisic acid responsiveness
CgCYP75B6	198	TGA-element	Auxin responsiveness
CgCYP75B6	1497	TGA-element	Auxin responsiveness
CgCYP75B6	787	G-box	Light responsive element
CgCYP75B6	1821	GATA-motif	Light responsive element
CgCYP75B6	1666	Sp1	Light responsive element
CgCYP75B6	899	AT1-motif	Light responsive element
CgCYP75B6	180	CGTCA-motif	MeJA-responsiveness
CgCYP75B6	1136	CGTCA-motif	MeJA-responsiveness
CgCYP75B6	1302	CGTCA-motif	MeJA-responsiveness
CgCYP75B6	1457	CGTCA-motif	MeJA-responsiveness
CgCYP75B6	1535	CGTCA-motif	MeJA-responsiveness
CgCYP75B6	1730	CGTCA-motif	MeJA-responsiveness
CgCYP75B6	1377	ARE	Anaerobic induction
CgCYP75B6	91	GT1-motif	Light responsive element
CgCYP75B6	1231	TCCC-motif	Light responsive element
CgCYP75B6	1670	I-box	Light responsive element
CgCYP75B6	1823	I-box	Light responsive element
CgCYP75B6	180	TGACG-motif	MeJA-responsiveness
CgCYP75B6	1136	TGACG-motif	MeJA-responsiveness
CgCYP75B6	1302	TGACG-motif	MeJA-responsiveness
CgCYP75B6	1457	TGACG-motif	MeJA-responsiveness
CgCYP75B6	1535	TGACG-motif	MeJA-responsiveness
CgCYP75B6	1730	TGACG-motif	MeJA-responsiveness
CgCYP75B6	486	ATCT-motif	Light responsive element
CgCYP75B6	1866	Box 4	Light responsive element
The downstream 2k bp of CgCYP75s.
ID	Length	Name	Function
CgCYP75A1	1584	CGTCA-motif	MeJA-responsiveness
CgCYP75A1	1910	LTR	Low-temperature responsiveness
CgCYP75A1	1584	TGACG-motif	MeJA-responsiveness
CgCYP75A1	1986	G-box	Light responsive element
CgCYP75A1	1556	ABRE	Abscisic acid responsiveness
CgCYP75A1	1359	chs-CMA1a	Light responsive element
CgCYP75A1	866	TCCC-motif	Light responsive element
CgCYP75A1	874	TCCC-motif	Light responsive element
CgCYP75A1	882	TCCC-motif	Light responsive element
CgCYP75A1	890	TCCC-motif	Light responsive element
CgCYP75A1	282	TCT-motif	Light responsive element
CgCYP75A1	1662	TGA-element	Auxin-responsive element
CgCYP75A1	577	ATCT-motif	Light responsive element
CgCYP75A1	700	Box 4	Light responsive element
CgCYP75A1	1161	Box 4	Light responsive element
CgCYP75A1	1165	Box 4	Light responsive element
CgCYP75A1	1549	Box 4	Light responsive element
CgCYP75A2	1655	ACE	Light responsive element
CgCYP75A2	1142	TGACG-motif	MeJA-responsiveness
CgCYP75A2	1416	Gap-box	Light responsive element
CgCYP75A2	1142	CGTCA-motif	MeJA-responsiveness
CgCYP75A2	1295	ABRE	Abscisic acid responsiveness
CgCYP75A2	1295	G-box	Light responsive element
CgCYP75A2	1943	MBS	MYB binding site
CgCYP75A2	147	ARE	Anaerobic induction
CgCYP75A2	1579	ARE	Anaerobic induction
CgCYP75A2	236	TCT-motif	Light responsive element
CgCYP75A2	1526	TCT-motif	Light responsive element
CgCYP75A2	531	ATCT-motif	Light responsive element
CgCYP75A2	1219	TGA-element	Auxin-responsive element
CgCYP75A2	1165	TCA-element	Salicylic acid responsiveness
CgCYP75A2	654	Box 4	Light responsive element
CgCYP75B1	574	MRE	MYB binding site
CgCYP75B1	489	Box 4	Light responsive element
CgCYP75B1	520	Box 4	Light responsive element
CgCYP75B1	664	Box 4	Light responsive element
CgCYP75B1	727	Box 4	Light responsive element
CgCYP75B1	766	Box 4	Light responsive element
CgCYP75B1	1079	Box 4	Light responsive element
CgCYP75B1	1535	Box 4	Light responsive element
CgCYP75B1	1983	Box 4	Light responsive element
CgCYP75B1	572	GT1-motif	Light responsive element
CgCYP75B1	594	GT1-motif	Light responsive element
CgCYP75B1	19	ARE	Anaerobic induction
CgCYP75B1	641	ARE	Anaerobic induction
CgCYP75B1	475	TGA-element	Auxin-responsive element
CgCYP75B1	1925	GARE-motif	Gibberellin-responsive element
CgCYP75B1	1166	TATC-box	Gibberellin-responsive element
CgCYP75B2	1496	LAMP-element	Light responsive element
CgCYP75B2	1352	MBS	MYB binding site
CgCYP75B2	852	TC-rich repeats	Defense and stress responsiveness
CgCYP75B2	1924	TC-rich repeats	Defense and stress responsiveness
CgCYP75B2	689	ARE	Anaerobic induction
CgCYP75B2	242	Box 4	Light responsive element
CgCYP75B2	1064	Box 4	Light responsive element
CgCYP75B2	255	GT1-motif	Light responsive element
CgCYP75B2	264	GT1-motif	Light responsive element
CgCYP75B2	265	GT1-motif	Light responsive element
CgCYP75B2	583	GT1-motif	Light responsive element
CgCYP75B2	139	3-AF1 binding site	Light responsive element
CgCYP75B2	561	TCT-motif	Light responsive element
CgCYP75B2	1290	TCT-motif	Light responsive element
CgCYP75B2	631	ATCT-motif	Light responsive element
CgCYP75B2	1196	AE-box	Light responsive element
CgCYP75B2	1318	I-box	Light responsive element
CgCYP75B2	738	TCA-element	Salicylic acid responsiveness
CgCYP75B2	1005	TCA-element	Salicylic acid responsiveness
CgCYP75B2	1017	TCA-element	Salicylic acid responsiveness
CgCYP75B2	475	TATC-box	Gibberellin-responsive element
CgCYP75B2	6	chs-CMA1a	Light responsive element
CgCYP75B2	713	GATA-motif	Light responsive element
CgCYP75B2	1316	GATA-motif	Light responsive element
CgCYP75B3	1681	TCCC-motif	Light responsive element
CgCYP75B3	1984	GARE-motif	Gibberellin-responsive element
CgCYP75B3	250	GATA-motif	Light responsive element
CgCYP75B3	653	GATA-motif	Light responsive element
CgCYP75B3	53	P-box	Gibberellin-responsive element
CgCYP75B3	373	TATC-box	Gibberellin-responsive element
CgCYP75B3	1434	GT1-motif	Light responsive element
CgCYP75B3	183	ARE	Anaerobic induction
CgCYP75B3	1846	LAMP-element	Light responsive element
CgCYP75B3	1776	MBS	MYB binding site
CgCYP75B3	567	G-box	Light responsive element
CgCYP75B3	640	G-box	Light responsive element
CgCYP75B3	1768	G-box	Light responsive element
CgCYP75B4	183	ARE	Anaerobic induction
CgCYP75B4	567	G-box	Light responsive element
CgCYP75B4	640	G-box	Light responsive element
CgCYP75B4	1768	G-box	Light responsive element
CgCYP75B4	1776	MBS	MYB binding site
CgCYP75B4	1846	LAMP-element	Light responsive element
CgCYP75B4	1434	GT1-motif	Light responsive element
CgCYP75B4	53	P-box	Gibberellin-responsive element
CgCYP75B4	373	TATC-box	Gibberellin-responsive element
CgCYP75B4	1984	GARE-motif	Gibberellin-responsive element
CgCYP75B4	250	GATA-motif	Light responsive element
CgCYP75B4	653	GATA-motif	Light responsive element
CgCYP75B4	1681	TCCC-motif	Light responsive element
CgCYP75B5	497	Box 4	Light responsive element
CgCYP75B5	1346	Box 4	Light responsive element
CgCYP75B5	1592	Box 4	Light responsive element
CgCYP75B5	89	ARE	Anaerobic induction
CgCYP75B5	416	GT1-motif	Light responsive element
CgCYP75B5	1733	TC-rich repeats	Defense and stress responsiveness
CgCYP75B5	1917	TGACG-motif	MeJA-responsiveness
CgCYP75B5	1537	GA-motif	Light responsive element
CgCYP75B5	1917	CGTCA-motif	MeJA-responsiveness
CgCYP75B6	497	Box 4	Light responsive element
CgCYP75B6	1346	Box 4	Light responsive element
CgCYP75B6	1592	Box 4	Light responsive element
CgCYP75B6	416	GT1-motif	Light responsive element
CgCYP75B6	89	ARE	Anaerobic induction
CgCYP75B6	1733	TC-rich repeats	Defense and stress responsiveness
CgCYP75B6	1537	GA-motif	Light responsive element
CgCYP75B6	1917	TGACG-motif	MeJA-responsiveness
CgCYP75B6	1917	CGTCA-motif	MeJA-responsiveness

## Sheet: Table S5
Table S5. Cis-acting element types and numbers of CgCYP75s.
ID	AAGAA-motif	A-box	ABRE	ARE	ATCT-motif	Box 4	CAAT-box	CARE	CAT-box	CCAAT-box	CGTCA-motif	DRE core	ERE	GA-motif	GARE-motif	GATA-motif	G-box	GC-motif	GT1-motif	I-box	LTR	MBS	MYB-binding site	MYC	NON-box	Sp1	STRE	TATA-box	TATC-box	TCA-element	TCCC-motif	TC-rich repeats	TCT-motif	TGACG-motif	TGA-element	W-box	WRE3	WUN-motif	Total
CgCYP75A1	0	1	1	0	1	10	36	0	0	0	1	0	4	2	0	1	1	0	0	0	1	2	0	4	1	0	1	60	0	0	4	0	1	1	1	0	0	3	137
CgCYP75A2	0	0	4	2	1	5	42	0	0	2	3	0	5	1	0	3	2	0	0	1	0	2	1	3	0	1	1	56	0	1	0	0	3	3	1	0	1	4	148
CgCYP75B1	0	0	6	3	0	12	56	0	0	0	1	0	5	0	1	1	7	0	3	0	1	0	4	4	0	0	0	83	1	0	0	0	1	1	1	0	0	0	191
CgCYP75B2	0	1	3	3	1	4	21	0	2	0	6	2	1	0	0	2	0	0	4	2	1	1	8	2	0	1	1	40	1	3	1	2	2	6	0	1	1	1	124
CgCYP75B3	3	0	0	2	1	3	35	1	0	0	0	0	3	0	1	2	3	1	1	0	1	1	10	4	0	0	1	54	1	0	1	1	3	0	0	2	0	0	135
CgCYP75B4	3	0	4	1	0	1	35	1	0	2	3	0	3	0	1	2	10	1	1	0	0	1	10	4	0	3	1	54	1	0	1	1	2	3	0	2	0	0	151
CgCYP75B5	2	0	1	1	1	3	31	0	0	0	3	0	6	1	0	0	1	0	2	0	0	1	0	1	0	0	1	118	0	0	0	1	0	3	1	0	0	0	178
CgCYP75B6	2	0	1	2	1	4	31	0	0	0	7	0	6	1	0	1	1	0	2	2	0	0	0	1	0	1	1	118	0	0	1	1	0	7	2	0	0	0	193
Total	10	2	20	14	6	42	287	2	2	4	24	2	33	5	3	12	25	2	13	5	4	8	33	23	1	6	7	583	4	4	8	6	12	24	6	5	2	8	1257

## Sheet: Table S6
Table S6. The FPKM values of orchid CYP75s in different flower organs.
C. goeringii
ID	GY-se	GY-pe	GY-lip	GY-gy	PR-se	PR-pe	PR-lip	PR-gy
CgCYP75A1	0.18	0.38	0.79	3.3	0.37	0.33	0.72	1.48
CgCYP75A2	0	0.16	0.82	2.3	0.65	0.52	0.73	1.44
CgCYP75B1	2.68	9.61	9.51	22.74	50.18	132.38	42.49	44.78
CgCYP75B2	0.78	0.26	0.42	0.59	0.75	0.22	1.26	2.14
CgCYP75B3	0	0	0	0	0	0	0	0
CgCYP75B4	1.88	2.56	0	0.18	0.17	0.35	0	3.26
CgCYP75B5	13.53	11.49	15.21	6.37	2.79	3.22	11.56	10.63
CgCYP75B6	9.18	0.47	1.38	1.33	4.28	1.2	0	0.02
C. ensifolium
ID	se	pe	lip	gy
CeCYP75A1	277.333	1011.31	456.333	2361.33
CeCYP75B1	80.6667	267.556	154.667	291
CeCYP75B2	1824.33	3567.31	3703.37	2437.73
CeCYP75B3	0	11.8447	0.666667	15.12
C. ensifolium
ID	se	pe	lip	gy
DchCYP75A1	1.29	0.56	0.64	1.37
DchCYP75A2	0.64	0.41	0.66	1.18
DchCYP75B1	0.77	0.34	0.03	1.08
DchCYP75B2	2.88	1	0.78	1.83
DchCYP75B3	0	0	0	0
DchCYP75B4	20.8	2.67	410.17	36.43
DchCYP75B5	7.38	4.08	4.43	4.11
D. catenatum
ID	se	lip	gy
DcaCYP75A1	53.79	94.23	53.58
DcaCYP75B1	17.03	76.38	5.77
DcaCYP75B2	3.7	30.27	12.96
DcaCYP75B3	0	0	0
DcaCYP75B4	0.44	0.62	2.77
DcaCYP75B5	3.9	6.45	2.85
P. equestris
ID	se	pe	lip	gy
PeqCYP75A1	6.19	3.67	1.54	7.18
PeqCYP75B1	0.05	0	0	0.09
PeqCYP75B2	2.36	0.86	1.5	0.94
PeqCYP75B3	6.58	0.92	0.54	1.4
PeqCYP75B4	16.61	34.83	172.52	39.33
PeqCYP75B5	54.05	9.04	7.07	16.1
A. shenzhenica
ID	in	st	tu	po
AshCYP75A1	22.04	10.08	16.91	0.18
AshCYP75B1	23.43	52.01	35.12	2.06
AshCYP75B2	5766.78	1247.97	892.61	11.23
AshCYP75B3	2.63	0.4	5.05	0.18
AshCYP75B4	2.96	28.13	2.42	15.93
Pl. zijinensis and Pl. guangdongensis
ID	fl	st	tu
PziCYP75A1	11.66	25.89	12.73
PziCYP75B1	53.3	190.19	1822.11
PziCYP75B2	55.53	3.25	1.56
PguCYP75B1	26.91	47	48.39
PguCYP75B2	0	0	0
G. elata
ID	pe	lip	gy
GelCYP75A1	0.05	0	0
GelCYP75B1	30.55	44.3267	26.8633
GelCYP75B2	59.2967	61.3967	59.31
GelCYP75B3	0.203333	0.193333	0.19

## Sheet: Table S7
Table S7. Gene ontology (GO) annotation of orchid CYP75s.
Class	GO_Name	GO_ID	GO_Level	P_value	EnrichmentScore	HitsGenesCountsInSelectedSet	HitsGenesCountsInBackground	AllGenesCountsInSelectedSet	AllGenesCountsInBackground	GenesOfSelectedSetInGOterm	corrected p-value(BH method)
Molecular function	oxidoreductase activity, acting on paired donors, with incorporation or reduction of molecular oxygen, NAD(P)H as one donor, and incorporation of one atom of oxygen	GO:0016709	5	0.00258099	1.07631	77	747	77	804	Vpla_KAG0466652.1,PAXXG116580,Maker109076,GL13941,PAXXG116590,Vpla_KAG0484886.1,Vpla_KAG0466649.1,Vpla_KAG0455628.1,Mol004997,Ash015225,Mol026160,Dca008241,Dca008242,Dca020470,PAXXG116560,Gel016567,Gel005429,Gel010620,PGU010950,PGU020216,Ash007554,GL26797,GL26798,Maker59722,GL26799,GL26796,Dca013687,Dca013688,Maker83891,PZI015225,Dhu000020018,Dhu000019542,Mol021869,JL021320,JL021322,JL021323,JL02…	0.0154859
Cellular component	membrane	GO:0016020	3	0.00865237	1.06053	77	793	77	841	Vpla_KAG0466652.1,PAXXG116580,Maker109076,GL13941,PAXXG116590,Vpla_KAG0484886.1,Vpla_KAG0466649.1,Vpla_KAG0455628.1,Mol004997,Ash015225,Mol026160,Dca008241,Dca008242,Dca020470,PAXXG116560,Gel016567,Gel005429,Gel010620,PGU010950,PGU020216,Ash007554,GL26797,GL26798,Maker59722,GL26799,GL26796,Dca013687,Dca013688,Maker83891,PZI015225,Dhu000020018,Dhu000019542,Mol021869,JL021320,JL021322,JL021323,JL02…	0.0259571
Biological process	response to stimulus	GO:0050896	2	0	1.79245	77	477	77	855	Vpla_KAG0466652.1,PAXXG116580,Maker109076,GL13941,PAXXG116590,Vpla_KAG0484886.1,Vpla_KAG0466649.1,Vpla_KAG0455628.1,Mol004997,Ash015225,Mol026160,Dca008241,Dca008242,Dca020470,PAXXG116560,Gel016567,Gel005429,Gel010620,PGU010950,PGU020216,Ash007554,GL26797,GL26798,Maker59722,GL26799,GL26796,Dca013687,Dca013688,Maker83891,PZI015225,Dhu000020018,Dhu000019542,Mol021869,JL021320,JL021322,JL021323,JL02…	0
Biological process	response to auxin	GO:0009733	6	0	6.24088	77	137	77	855	Vpla_KAG0466652.1,PAXXG116580,Maker109076,GL13941,PAXXG116590,Vpla_KAG0484886.1,Vpla_KAG0466649.1,Vpla_KAG0455628.1,Mol004997,Ash015225,Mol026160,Dca008241,Dca008242,Dca020470,PAXXG116560,Gel016567,Gel005429,Gel010620,PGU010950,PGU020216,Ash007554,GL26797,GL26798,Maker59722,GL26799,GL26796,Dca013687,Dca013688,Maker83891,PZI015225,Dhu000020018,Dhu000019542,Mol021869,JL021320,JL021322,JL021323,JL02…	0
Biological process	response to organic substance	GO:0010033	4	3.33067e-16	2.38827	77	358	77	855	Vpla_KAG0466652.1,PAXXG116580,Maker109076,GL13941,PAXXG116590,Vpla_KAG0484886.1,Vpla_KAG0466649.1,Vpla_KAG0455628.1,Mol004997,Ash015225,Mol026160,Dca008241,Dca008242,Dca020470,PAXXG116560,Gel016567,Gel005429,Gel010620,PGU010950,PGU020216,Ash007554,GL26797,GL26798,Maker59722,GL26799,GL26796,Dca013687,Dca013688,Maker83891,PZI015225,Dhu000020018,Dhu000019542,Mol021869,JL021320,JL021322,JL021323,JL02…	1.33227e-15
Biological process	response to endogenous stimulus	GO:0009719	3	3.33067e-16	2.68868	77	318	77	855	Vpla_KAG0466652.1,PAXXG116580,Maker109076,GL13941,PAXXG116590,Vpla_KAG0484886.1,Vpla_KAG0466649.1,Vpla_KAG0455628.1,Mol004997,Ash015225,Mol026160,Dca008241,Dca008242,Dca020470,PAXXG116560,Gel016567,Gel005429,Gel010620,PGU010950,PGU020216,Ash007554,GL26797,GL26798,Maker59722,GL26799,GL26796,Dca013687,Dca013688,Maker83891,PZI015225,Dhu000020018,Dhu000019542,Mol021869,JL021320,JL021322,JL021323,JL02…	1.33227e-15
Biological process	response to chemical	GO:0042221	3	3.33067e-16	2.38827	77	358	77	855	Vpla_KAG0466652.1,PAXXG116580,Maker109076,GL13941,PAXXG116590,Vpla_KAG0484886.1,Vpla_KAG0466649.1,Vpla_KAG0455628.1,Mol004997,Ash015225,Mol026160,Dca008241,Dca008242,Dca020470,PAXXG116560,Gel016567,Gel005429,Gel010620,PGU010950,PGU020216,Ash007554,GL26797,GL26798,Maker59722,GL26799,GL26796,Dca013687,Dca013688,Maker83891,PZI015225,Dhu000020018,Dhu000019542,Mol021869,JL021320,JL021322,JL021323,JL02…	1.33227e-15
Biological process	response to hormone	GO:0009725	5	3.33067e-16	2.68868	77	318	77	855	Vpla_KAG0466652.1,PAXXG116580,Maker109076,GL13941,PAXXG116590,Vpla_KAG0484886.1,Vpla_KAG0466649.1,Vpla_KAG0455628.1,Mol004997,Ash015225,Mol026160,Dca008241,Dca008242,Dca020470,PAXXG116560,Gel016567,Gel005429,Gel010620,PGU010950,PGU020216,Ash007554,GL26797,GL26798,Maker59722,GL26799,GL26796,Dca013687,Dca013688,Maker83891,PZI015225,Dhu000020018,Dhu000019542,Mol021869,JL021320,JL021322,JL021323,JL02…	1.33227e-15
Biological process	secondary metabolic process	GO:0019748	3	0.000355682	1.10323	77	775	77	855	Vpla_KAG0466652.1,PAXXG116580,Maker109076,GL13941,PAXXG116590,Vpla_KAG0484886.1,Vpla_KAG0466649.1,Vpla_KAG0455628.1,Mol004997,Ash015225,Mol026160,Dca008241,Dca008242,Dca020470,PAXXG116560,Gel016567,Gel005429,Gel010620,PGU010950,PGU020216,Ash007554,GL26797,GL26798,Maker59722,GL26799,GL26796,Dca013687,Dca013688,Maker83891,PZI015225,Dhu000020018,Dhu000019542,Mol021869,JL021320,JL021322,JL021323,JL02…	0.00060974
Biological process	secondary metabolite biosynthetic process	GO:0044550	4	0.000355682	1.10323	77	775	77	855	Vpla_KAG0466652.1,PAXXG116580,Maker109076,GL13941,PAXXG116590,Vpla_KAG0484886.1,Vpla_KAG0466649.1,Vpla_KAG0455628.1,Mol004997,Ash015225,Mol026160,Dca008241,Dca008242,Dca020470,PAXXG116560,Gel016567,Gel005429,Gel010620,PGU010950,PGU020216,Ash007554,GL26797,GL26798,Maker59722,GL26799,GL26796,Dca013687,Dca013688,Maker83891,PZI015225,Dhu000020018,Dhu000019542,Mol021869,JL021320,JL021322,JL021323,JL02…	0.00060974
Biological process	obsolete oxidation-reduction process	GO:0055114	0	0.00514606	1.06742	77	801	77	855	Vpla_KAG0466652.1,PAXXG116580,Maker109076,GL13941,PAXXG116590,Vpla_KAG0484886.1,Vpla_KAG0466649.1,Vpla_KAG0455628.1,Mol004997,Ash015225,Mol026160,Dca008241,Dca008242,Dca020470,PAXXG116560,Gel016567,Gel005429,Gel010620,PGU010950,PGU020216,Ash007554,GL26797,GL26798,Maker59722,GL26799,GL26796,Dca013687,Dca013688,Maker83891,PZI015225,Dhu000020018,Dhu000019542,Mol021869,JL021320,JL021322,JL021323,JL02…	0.00686141
Biological process	biosynthetic process	GO:0009058	3	0.0460081	1.03888	77	823	77	855	Vpla_KAG0466652.1,PAXXG116580,Maker109076,GL13941,PAXXG116590,Vpla_KAG0484886.1,Vpla_KAG0466649.1,Vpla_KAG0455628.1,Mol004997,Ash015225,Mol026160,Dca008241,Dca008242,Dca020470,PAXXG116560,Gel016567,Gel005429,Gel010620,PGU010950,PGU020216,Ash007554,GL26797,GL26798,Maker59722,GL26799,GL26796,Dca013687,Dca013688,Maker83891,PZI015225,Dhu000020018,Dhu000019542,Mol021869,JL021320,JL021322,JL021323,JL02…	0.0552097
